# Supplementary material for: Poly(ADP-ribose) polymerase 1 regulates nuclear reprogramming and promotes iPSC generation without c-Myc
Source: PubMed Central journal article supplement — J Exp Med. 2013 Jan 14;210(1):85–98. doi: 10.1084/jem.20121044 (PMC3549716; doi:10.1084/jem.20121044), 2013-01-14
Supplement: supp_jem.20121044_JEM_20121044_sm.pdf [file supp_jem.20121044_JEM_20121044_sm.pdf]

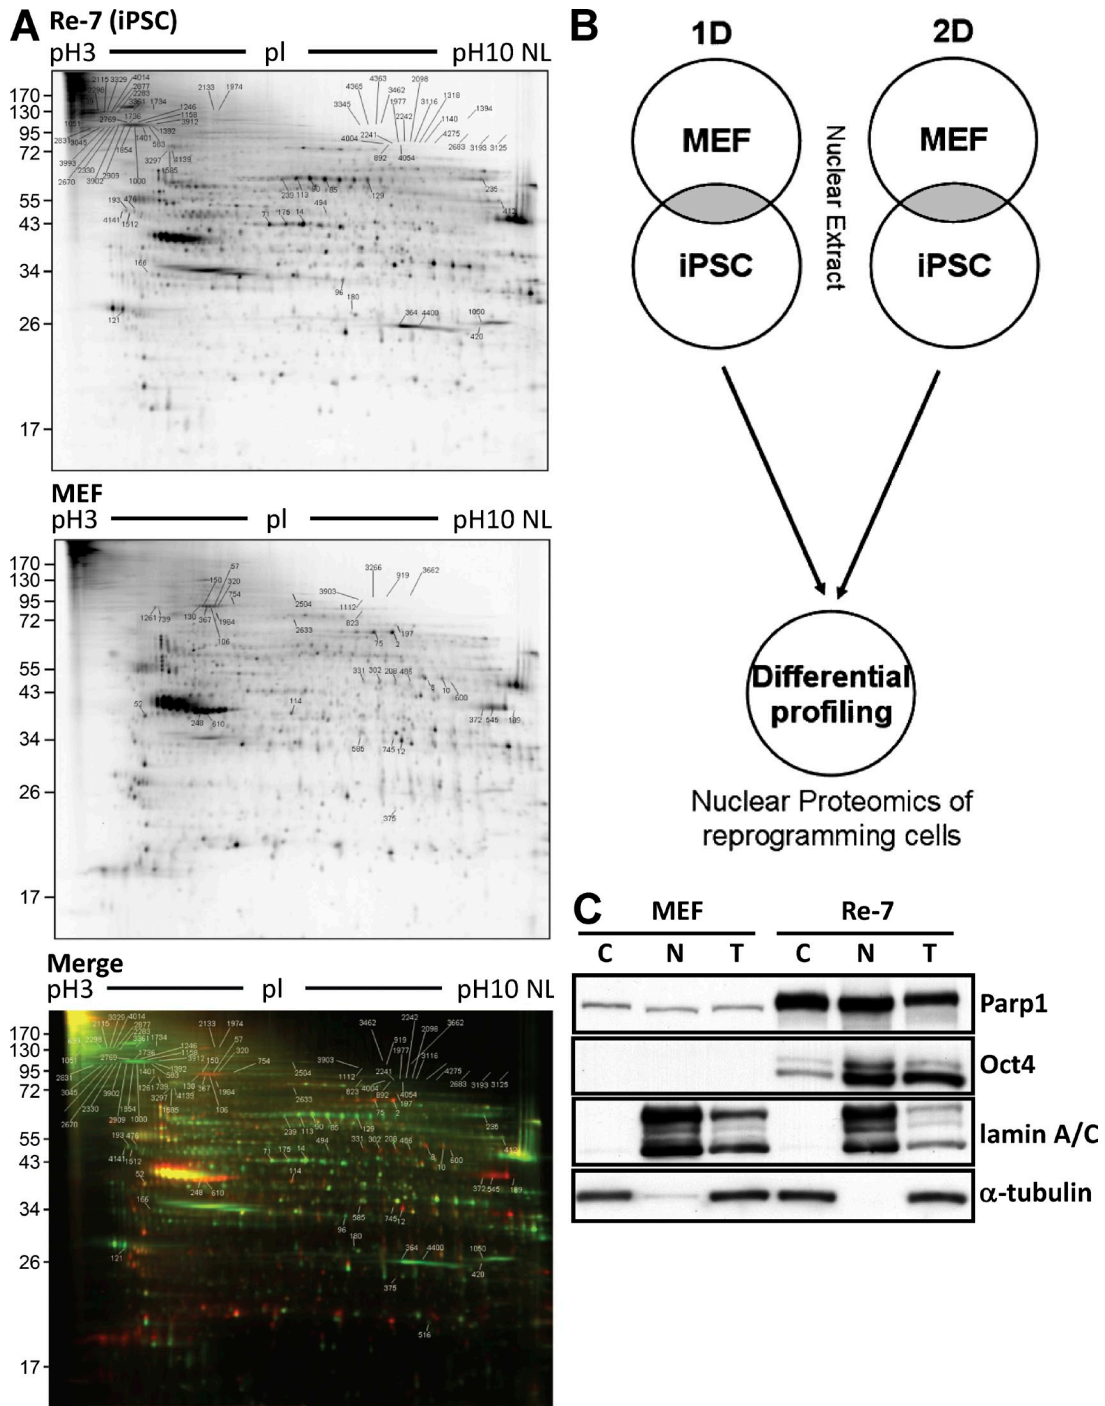

**Figure S1. Establishment of the differential profiling of nuclear proteins from pluripotent stem cells and MEFs by MS-based proteomics.** (A) 2D-differential gel electrophoresis (2D-DIGE) and sliver staining. Then the identified candidate proteins confirmed by LC-MS/MS. (B) Based on the statistical comparative analysis between the databases of 1D LC-MS/MS and 2D-differential gel electrophoresis, we sorted the hubs of nuclear proteins between the nuclear profiles from MEFs and iPSCs. (C) Detection of Parp1 and Oct4 expression in nuclear fractions and whole-cell lysates of MEFs and iPSCs. C: cytoplasmal fraction; N: nuclear fraction; T: total cell lysate.

GO:0051276 (chromosome organization)

FDR: 6.93E-22

| Gene name | Protein name                                   | Accession No. | pI    | Mw (kD) | R/M      |
|-----------|------------------------------------------------|---------------|-------|---------|----------|
| Kdm4C     | Lysine-Specific Demethylase 4C                 | Q8VCD7        | 6.67  | 119.966 | 52.6034  |
| Eed       | Embryonic Ectoderm Development                 | Q921E6        | 6.57  | 50.1977 | 47.45209 |
| Dnmt3A    | Dna Methyltransferase 3A                       | O88508        | 6.27  | 101.672 | 46.91265 |
| Baz2A     | Bromodomain Adjacent To Zinc Finger Domain, 2A | Q91YE5        | 6.09  | 209.618 | 39.31074 |
| Cenpv     | Centromere Protein V                           | Q9CXS4        | 9.85  | 27.5411 | 39.2746  |
| Parp1     | Poly (Adp-Ribose) Polymerase Family, Member 1  | P11103        | 9.05  | 112.969 | 38.90801 |
| Smarca1   | BRG1-associated factor 60A                     | Q61466        | 9.31  | 58.2446 | 37.80404 |
| Suz12     | Suppressor Of Zeste 12 Homolog                 | Q80U70        | 8.98  | 83.0258 | 29.64185 |
| Top2A     | Topoisomerase II Alpha                         | Q01320        | 8.73  | 172.79  | 28.32493 |
| Cdca5     | Cell Division Cycle Associated 5               | Q9CPY3        | 9.61  | 28.9913 | 27.26577 |
| Kdm5B     | Lysine-Specific Demethylase 5B                 | Q80Y84        | 6.03  | 175.555 | 26.01286 |
| Ezh2      | Enhancer Of Zeste Homolog 2                    | Q61188        | 6.51  | 85.2921 | 24.70515 |
| Yeats4    | Yeats Domain Containing 4                      | Q9CR11        | 8.4   | 26.5295 | 20.52706 |
| Rpa1      | Replication Protein A1                         | Q8VEE4        | 8.15  | 68.906  | 20.06811 |
| Aebp2     | Ae Binding Protein 2                           | Q9Z248        | 5.18  | 52.8318 | 14.91252 |
| Arid1A    | At Rich Interactive Domain 1A Isoform A        | A2BH40        | 6.22  | 241.96  | 14.79766 |
| Myst2     | Myst Histone Acetyltransferase 2               | Q5SVQ0        | 8.91  | 70.6414 | 12.41158 |
| Rnf2      | Ring Finger Protein 2                          | Q9CQJ4        | 6.38  | 37.6233 | 10.06827 |
| Ep400     | E1A Binding Protein P400                       | Q8CH18        | 9.23  | 337.18  | 9.41551  |
| H1Fcx     | H1 Histone Family, Member X                    | Q80ZM5        | 11.22 | 20.1512 | 8.69267  |
| Chd7      | Chromodomain Helicase Dna Binding Protein 7    | A2AJK6        | 6.05  | 334.061 | 8.541889 |
| Hells     | Helicase, Lymphoid Specific                    | Q60848        | 8.2   | 95.1257 | 8.429322 |
| Tbl1Xr1   | Transducin (Beta)-Like 1X-Linked Receptor 1    | Q8BHJ5        | 5.33  | 55.661  | 8.353551 |
| H2Afx     | H2A Histone Family, Member Z                   | POC056        | 10.58 | 13.4216 | 8.036586 |
| Cbx1      | Chromobox Homolog 1                            | R83917        | 4.85  | 21.4178 | 7.681118 |
| Rbbp4     | Retinoblastoma Binding Protein 4               | Q60972        | 4.74  | 47.5245 | 7.602614 |
| Smarca5   | Sucrose nonfermenting protein 2 homolog        | Q91ZW3        | 8.35  | 121.627 | 7.587036 |
| Hist1H1A  | Histone Cluster 1, H1A                         | P43275        | 10.93 | 21.6539 | 7.364118 |
| Mo4L1     | Mortality Factor 4-Like Protein 1              | P60762        | 9.34  | 41.4926 | 7.174833 |
| Hdac1     | Histone Deacetylase Hd1                        | O09106        | 5.31  | 55.075  | 6.682088 |
| Cbx5      | Chromobox Homolog 5                            | Q61686        | 5.71  | 22.186  | 6.617629 |
| Chd4      | Chromodomain Helicase Dna Binding Protein 4    | Q6PDO2        | 5.58  | 217.751 | 6.611086 |
| Smarca4   | Transcription activator BRG1                   | Q3TKT4        | 8     | 181.427 | 6.31462  |
| Dnmt1     | Dna Methyltransferase 1                        | P13864        | 7.92  | 183.189 | 6.170368 |
| Bptf      | Bromodomain Phd Finger Transcription Factor    | A2A655        | 6.74  | 326.776 | 6.141232 |
| Dmap1     | Dna Methyltransferase 1-Associated Protein 1   | Q9J44         | 9.51  | 53.1298 | 6.114842 |

GO:0045449 (regulation of transcription)

FDR: 1.78E-10

| Gene name | Protein name                                                 | Accession No. | pI    | Mw (kD) | R/M    |
|-----------|--------------------------------------------------------------|---------------|-------|---------|--------|
| Esrrb     | Estrogen Related Receptor, Beta                              | Q61539        | 8.27  | 48.40   | 570.24 |
| Sall4     | Sal-Like 4                                                   | Q8BX22        | 8.02  | 113.11  | 284.81 |
| Utf1      | Undifferentiated Embryonic Cell Transcription Factor 1       | Q6J1H4        | 10.05 | 36.41   | 268.16 |
| Rybp      | Ring1 And Yy1 Binding Protein                                | Q8CC15        | 9.66  | 24.78   | 77.31  |
| Yy1       | Yy1 Transcription Factor                                     | Q00899        | 5.83  | 44.72   | 19.18  |
| Atrx      | Transcriptional regulator ATRX                               | Q61687        | 6.30  | 278.59  | 18.52  |
| Abt1      | Activator Of Basal Transcription 1                           | Q9QYL7        | 10.02 | 30.66   | 16.92  |
| Naec1     | Nucleus Accumbens Associated 1                               | Q7T5Z8        | 5.51  | 56.54   | 14.91  |
| Dnajb6    | Dnaj Homolog, Subfamily B, Member 6                          | O54946        | 9.37  | 39.68   | 11.66  |
| Rbpj      | Recombining binding protein suppressor of hairless           | P31266        | 8.43  | 58.54   | 11.27  |
| Sub1      | Activated RNA polymerase II transcriptional coactivator p15  | P11031        | 9.60  | 14.30   | 9.65   |
| Ctbp2     | C-Terminal Binding Protein 2                                 | P56546        | 6.47  | 48.96   | 8.43   |
| Supt6H    | Suppressor Of Ty 6 Homolog                                   | Q62383        | 4.83  | 199.09  | 8.23   |
| Nfyc      | Nuclear Transcription Factor-Y Gamma                         | P70353        | 4.86  | 37.25   | 7.23   |
| Psp1      | Pc4 And Sfrs1 Interacting Protein 1                          | Q99JF8        | 9.15  | 59.70   | 7.09   |
| Sfrbp1    | Serum Response Factor Binding Protein 1                      | Q9CZ91        | 9.56  | 48.75   | 6.65   |
| Gtf2H4    | General Transcription Factor II H, Polypeptide 4             | O70422        | 9.12  | 52.22   | 6.28   |
| Dnrtip2   | Deoxynucleotidyltransferase, Terminal, Interacting Protein 2 | Q8R2M2        | 6.07  | 84.28   | 6.13   |

GO:0006259 (DNA metabolic process)

FDR: 7.95E-15

| Gene name | Protein name                                              | Accession No. | pI   | Mw (kD) | R/M   |
|-----------|-----------------------------------------------------------|---------------|------|---------|-------|
| Uhrf1     | Ubiquitin-Like, Containing Phd And Ring Finger Domains, 1 | Q8VDF2        | 8.63 | 88.30   | 51.00 |
| Kif22     | Kinesin Family Member 22                                  | Q3V300        | 9.30 | 73.19   | 33.48 |
| Orc3L     | Origin Recognition Complex, Subunit 3-Like                | Q9JK30        | 7.09 | 82.34   | 32.91 |
| Msh6      | Muts Homolog 6                                            | P54276        | 6.31 | 151.08  | 29.77 |
| Msh2      | Muts Homolog 2                                            | P43247        | 5.71 | 104.15  | 28.25 |
| Orc2L     | Origin Recognition Complex, Subunit 2-Like                | Q60862        | 6.34 | 65.89   | 26.95 |
| Rpa3      | Replication Protein A3                                    | Q9CQ71        | 4.78 | 13.58   | 26.54 |
| Rpa2      | Replication Protein A2                                    | Q62193        | 5.74 | 29.72   | 22.26 |
| Lig1      | Ligase I, Dna, Atp-Dependent                              | P37913        | 6.43 | 102.29  | 21.04 |
| Orc5L     | Origin Recognition Complex, Subunit 5-Like                | Q9WUV0        | 8.23 | 50.22   | 12.94 |
| Hmgb2     | High Mobility Group Box 2                                 | P30681        | 7.04 | 24.03   | 12.44 |
| Atm       | Ataxia Telangiectasia Mutated Homolog                     | Q62388        | 6.43 | 349.42  | 11.93 |
| Pcna      | Proliferating Cell Nuclear Antigen                        | P17918        | 4.66 | 28.78   | 10.34 |
| Mdc1      | Mediator Of Dna Damage Checkpoint 1                       | Q5PSV9        | 5.10 | 184.67  | 10.03 |
| Prim2     | Dna Primase, P58 Subunit                                  | P33610        | 8.47 | 58.41   | 8.30  |
| Ssbp1     | Single-Stranded Dna Binding Protein 1                     | Q9CYR0        | 9.34 | 15.22   | 8.19  |
| Mpg       | N-Methylpurine-Dna Glycosylase                            | Q04841        | 9.53 | 36.47   | 6.10  |

GO:0007049 (cell cycle)

FDR: 7.53E-06

| Gene name | Protein name                                    | Accession No. | pI    | Mw (kD) | R/M    |
|-----------|-------------------------------------------------|---------------|-------|---------|--------|
| Rif1      | Rap1 Interacting Factor 1 Homolog               | Q6PR54        | 5.43  | 266.23  | 273.02 |
| Aurkb     | Aurora Kinase B                                 | O70126        | 9.47  | 39.38   | 56.90  |
| Mki67     | Antigen Identified By Monoclonal Antibody Ki 67 | Q61769        | 9.76  | 324.43  | 47.16  |
| Ccnb1     | Cyclin B1                                       | P24860        | 7.10  | 48.05   | 32.95  |
| Cdca8     | Cell Division Cycle Associated 8                | Q8BHX3        | 10.13 | 32.21   | 22.72  |
| Tpx2      | Microtubule-Associated Protein Homolog          | AZAPB8        | 9.41  | 85.89   | 14.53  |
| Ckap2     | Cytoskeleton Associated Protein 2               | Q3V1H1        | 9.29  | 74.03   | 11.70  |
| Plk1      | Polo-Like Kinase 1                              | Q07832        | 8.93  | 68.30   | 11.35  |
| Ahctf1    | At Hook Containing Transcription Factor 1       | Q8CJF7        | 6.12  | 247.65  | 9.12   |
| Kifc1     | Kinesin Family Member C1                        | Q9QWT9        | 8.95  | 74.15   | 8.59   |
| Racgap1   | Rac Gtpase-Activating Protein 1                 | Q9WVV1        | 8.78  | 70.16   | 6.78   |
| Cdk1      | Cell Division Cycle 2 Homolog A                 | P11440        | 8.40  | 34.11   | 6.27   |
| Rcc2      | Regulator Of Chromosome Condensation 2          | Q8BK67        | 8.97  | 55.98   | 6.23   |

Others

non-significant classification

| Gene name | Protein name                                           | Accession No. | pI    | Mw (kD) | R/M    |
|-----------|--------------------------------------------------------|---------------|-------|---------|--------|
| L1TD1     | Line-1 Type Transposase Domain Containing 1            | Q87J76        | 5.38  | 88.19   | 162.20 |
| Jarid2    | Jumonji/Arid Domain-Containing Protein 2               | Q62315        | 9.49  | 137.45  | 83.72  |
| Pou5F1    | Pou Domain, Class 5, Transcription Factor 1            | P20263        | 6.05  | 38.22   | 56.84  |
| Mtf2      | Metal Response Element Binding Transcription Factor 2  | Q02395        | 8.95  | 66.92   | 40.80  |
| Lrw1      | Leucine-Rich Repeats And Wd Repeat Domain Containing 1 | Q8BU13        | 8.15  | 71.59   | 33.86  |
| Ppil1     | Peptidylprolyl Isomerase-Like 1                        | Q9DDW5        | 7.78  | 18.24   | 32.26  |
| Kif2C     | Kinesin Family Member 2C                               | Q92258        | 8.22  | 81.09   | 31.98  |
| Rcor2     | Rest Corepressor 2                                     | Q8C796        | 9.08  | 57.91   | 28.16  |
| Bap18     | Chromatin Complexes Subunit Bap18                      | Q9DCT6        | 6.74  | 18.00   | 26.11  |
| Ube25     | Ubiquitin-Conjugating Enzyme E25                       | Q921J4        | 7.73  | 24.18   | 25.43  |
| Cf130     | O-Acetyl-Adp-Ribose Deacetylase CGOrf130 Homolog       | Q8R5F3        | 8.79  | 16.96   | 22.94  |
| Pycr2     | Pyrrrole-5-Carboxylate Reductase Family, Member 2      | Q922Q4        | 7.65  | 33.53   | 22.81  |
| Tjp2      | Tight Junction Protein 2                               | Q920U1        | 6.35  | 131.28  | 19.10  |
| Cggbp1    | Cgg Triplet Repeat Binding Protein 1                   | Q8BHG9        | 9.14  | 18.76   | 18.01  |
| Ddx49     | Dead (Asp-Glu-Ala-Asp) Box Polypeptide 49              | Q4FZF3        | 9.02  | 54.09   | 17.63  |
| Lbr       | Lamin B Receptor                                       | Q3U9G9        | 9.43  | 71.44   | 16.79  |
| Naa40     | N-Acetyltransferase 11                                 | Q8VE10        | 7.15  | 27.10   | 16.48  |
| Ino80C    | Ino80 Complex Subunit C                                | Q8BHA0        | 10.03 | 20.41   | 15.45  |
| SFB5      | Splicing Factor 3B, Subunit 5                          | Q923D4        | 5.89  | 10.12   | 15.15  |
| Nop10     | Nop10 Ribonucleoprotein Homolog                        | Q9CQS2        | 10.01 | 7.71    | 15.01  |
| Rpp25     | Ribonuclease P 25 Subunit                              | Q91WE3        | 9.26  | 21.04   | 14.32  |
| Usp48     | Ubiquitin Specific Peptidase 48                        | Q3V0C5        | 5.89  | 120.63  | 13.58  |
| Rbpms     | Rna Binding Protein Gene With Multiple Splicing        | Q9CPU5        | 5.97  | 24.29   | 12.05  |
| Polr1D    | Polymerase (Rna) I Polypeptide D                       | P97304        | 6.43  | 15.07   | 11.57  |
| Snrpe     | Small Nuclear Ribonucleoprotein E                      | P62305        | 9.46  | 10.80   | 10.88  |
| Morc3     | Microrchidia 3                                         | Q4QQR6        | 5.50  | 106.50  | 10.41  |
| Gl3       | Gene Trap Locus 3                                      | Q8BTU1        | 9.78  | 22.75   | 10.30  |
| Polr2J    | Polymerase (Rna) II Polypeptide J                      | O08740        | 5.59  | 13.25   | 10.30  |
| Smpd4     | Sphingomyelin Phosphodiesterase 4                      | Q6ZPRS        | 8.38  | 93.28   | 10.24  |
| Setd6     | Set Domain Containing 6                                | Q8CIL4        | 9.85  | 31.34   | 9.91   |
| Coil      | Riken Cdna 2210409E12 Gene                             | Q3UJN9        | 9.26  | 62.23   | 9.02   |
| Snrpb     | Small Nuclear Ribonucleoprotein B                      | P27048        | 10.91 | 23.66   | 8.55   |
| Dnajc17   | Dnaj Homolog, Subfamily C, Member 17                   | Q91W74        | 8.35  | 34.50   | 8.37   |
| Lyar      | Ly1 Antibody Reactive Clone                            | Q08288        | 9.52  | 43.74   | 8.31   |
| Rpl38     | Similar To Ribosomal Protein L38                       | P52293        | 5.49  | 57.80   | 8.27   |
| Kif20A    | Kinesin Family Member 20A                              | P97329        | 6.55  | 99.88   | 8.15   |
| Wdr5      | Wd Repeat Domain 5                                     | P61965        | 8.54  | 36.59   | 8.11   |
| Rprd1A    | Regulation Of Nuclear Pre-Mrna Domain Containing 1A    | Q8VDS4        | 7.14  | 35.57   | 8.08   |
| H2Afv     | H2A Histone Family, Member V                           | Q3THW5        | 10.58 | 13.38   | 8.04   |
| Nol8      | Nucleolar Protein 8                                    | Q3UHX0        | 6.12  | 128.64  | 7.81   |
| Atad5     | Atpase Family, Aaa Domain Containing 5                 | Q4QY64        | 9.06  | 203.91  | 7.80   |
| Hnrnp1    | Heterogeneous Nuclear Ribonucleoprotein L              | Q8R081        | 8.33  | 63.96   | 7.70   |
| Stribp    | Spermatid Perinuclear Rna Binding Protein              | Q91WM1        | 8.91  | 73.70   | 7.69   |
| Pogz      | Pogo Transposable Element With Znf Domain              | Q8BZ44        | 7.39  | 154.91  | 7.51   |
| Son       | Son Dna Binding Protein                                | Q9QX47        | 5.46  | 265.52  | 7.50   |
| Mta3      | Metastasis Associated 3                                | Q924K8        | 9.05  | 67.08   | 7.45   |
| Urb1      | Urb1 Ribosome Biogenesis 1 Homolog                     | Q571H0        | 6.50  | 254.61  | 7.33   |
| Lmnb1     | Lamin B1                                               | P14733        | 5.11  | 66.34   | 7.26   |
| Polr2A    | Polymerase (Rna) II Polypeptide A                      | P08775        | 7.02  | 217.18  | 7.05   |

Figure S2. The 112 most up-regulated nuclear proteins in iPSCs compared with MEFs, using a statistical analysis between the databases of 1D LC-MS/MS and 2D-DIGE. PI: isoelectric point; Mw: molecular weight (kD); R/M: Re-7 (iPSC)-to-MEF Ratio (up-regulation folds).

**Table S1.** The differential expression profiles of the nuclear extracts using 1D LC-MS/MS. Compared with MEFs, the predominant candidates of nuclear protein profiles upregulated in iPSCs (Re-7) are listed.

| Protein ID  | Uniprot | Symbol  | Protein name                                                           | pI    | Mw (kDa) |
|-------------|---------|---------|------------------------------------------------------------------------|-------|----------|
| IP100974741 | Q61539  | Esrrb   | Estrogen Related Receptor, Beta                                        | 6.27  | 46.40    |
| IP100475184 | Q8BX22  | Sall4   | Sai-Like 4                                                             | 8.02  | 113.11   |
| IP100421167 | Q6PR54  | Rlf1    | Rap1 Interacting Factor 1 Homolog                                      | 5.43  | 266.23   |
| IP100454162 | Q6J1H4  | Utf1    | Undifferentiated Embryonic Cell Transcription Factor 1                 | 10.05 | 36.41    |
| IP101027679 | Q687J6  | L1Td1   | Line-1 Type Transposase Domain Containing 1                            | 5.38  | 88.19    |
| IP100124575 | Q62315  | Jarid2  | Jumonji/Arid Domain-Containing Protein 2                               | 9.49  | 137.45   |
| IP100228573 | Q8CC15  | Rybp    | Ring1 And Yy1 Binding Protein                                          | 9.66  | 24.78    |
| IP100268655 | O70126  | Aurkb   | Aurora Kinase B                                                        | 9.47  | 39.38    |
| IP100117218 | P20263  | Pou5F1  | Pou Domain, Class 5, Transcription Factor 1                            | 6.05  | 38.22    |
| IP100955640 | Q8VCD7  | Kdm4C   | Lysine-Specific Demethylase 4C                                         | 6.67  | 119.97   |
| IP100130200 | Q8VDF2  | Uhrf1   | Ubiquitin-Like, Containing Phd And Ring Finger Domains, 1              | 8.63  | 88.30    |
| IP100900431 | Q921E6  | Eed     | Embryonic Ectoderm Development                                         | 6.57  | 50.20    |
| IP100124959 | Q61769  | Mki67   | Antigen Identified By Monoclonal Antibody Ki 67                        | 9.76  | 324.43   |
| IP100131694 | Q88508  | Dnmt3A  | Dna Methyltransferase 3A                                               | 6.27  | 101.67   |
| IP100467892 | Q02395  | Mtf2    | Metal Response Element Binding Transcription Factor 2                  | 8.95  | 66.92    |
| IP100944144 | Q91YE5  | Baz2A   | Bromodomain Adjacent To Zinc Finger Domain, 2A                         | 6.09  | 209.62   |
| IP100318428 | Q9CSX4  | Cenpv   | Centromere Protein V                                                   | 9.85  | 27.54    |
| IP100121270 | Q61466  | Smarcd1 | Swi/Snf Complex 60 Kda Subunit                                         | 9.31  | 58.24    |
| IP100225459 | Q8BU13  | Lrwd1   | Leucine-Rich Repeats And Wd Repeat Domain Containing 1                 | 8.15  | 71.59    |
| IP100116757 | Q3V300  | Kif22   | Kinesin Family Member 22                                               | 9.30  | 73.19    |
| IP100111207 | P24860  | Ccnb1   | Cyclin B1                                                              | 7.10  | 48.05    |
| IP100311034 | Q8JK30  | Orc3L   | Origin Recognition Complex, Subunit 3-Like                             | 7.09  | 82.34    |
| IP100133229 | Q9DOW5  | Ppil1   | Peptidylprolyl Isomerase -Like 1                                       | 7.78  | 18.24    |
| IP100123365 | Q92258  | Kif2C   | Kinesin Family Member 2C                                               | 8.22  | 81.09    |
| IP100323790 | P54276  | Msh6    | Muts Homolog 6                                                         | 6.31  | 151.08   |
| IP100396676 | Q8OU70  | Suz12   | Suppressor Of Zeste 12 Homolog                                         | 8.98  | 83.03    |
| IP100122223 | Q01320  | Top2A   | Topoisomerase (Dna) II Alpha                                           | 8.73  | 172.79   |
| IP100118158 | P43247  | Msh2    | Muts Homolog 2                                                         | 5.71  | 104.15   |
| IP100226581 | Q8C796  | Rcor2   | Rest Corepressor 2                                                     | 9.08  | 57.91    |
| IP100132175 | Q9CPY3  | Cdca5   | Cell Division Cycle Associated 5                                       | 9.61  | 28.99    |
| IP100121509 | Q60862  | Orc2L   | Origin Recognition Complex, Subunit 2-Like                             | 6.34  | 65.89    |
| IP100132128 | Q9CQ71  | Rpa3    | Replication Protein A3                                                 | 4.78  | 13.58    |
| IP100968399 | Q9DCT6  | Bap18   | Chromatin Complexes Subunit Bap18                                      | 6.74  | 18.00    |
| IP100330824 | Q8OY84  | Kdm5B   | Lysine -Specific Demethylase 5B                                        | 6.03  | 175.56   |
| IP100121891 | Q921J4  | Ube2S   | Ubiquitin-Conjugating Enzyme E2S                                       | 7.73  | 24.18    |
| IP100468526 | Q61188  | Ezh2    | Enhancer Of Zeste Homolog 2                                            | 6.51  | 85.29    |
| IP100154005 | Q8R5F3  | Cf130   | O-Acetyl-Adp-Ribose Deacetylase C6Orf130 Homolog                       | 8.79  | 16.96    |
| IP100123278 | Q922Q4  | Pycr2   | Pyroline-5-Carboxylate Reductase Family, Member 2                      | 7.65  | 33.53    |
| IP100621765 | Q8BHx3  | Cdca8   | Cell Division Cycle Associated 8                                       | 10.13 | 32.21    |
| IP100311131 | Q62193  | Rpa2    | Replication Protein A2                                                 | 5.74  | 29.72    |
| IP100473314 | P37913  | Lig1    | Ligase I, Dna                                                          | 6.43  | 102.29   |
| IP100132946 | Q9CR11  | Yeats4  | Yeats Domain Containing 4                                              | 8.40  | 26.53    |
| IP100515393 | Q3U8B3  | Rpa1    | Replication Protein A1                                                 | 8.43  | 71.45    |
| IP100311892 | Q00899  | Yy1     | Yy1 Transcription Factor                                               | 5.83  | 44.72    |
| IP100989478 | Q9ZOU1  | Tjp2    | Tight Junction Protein 2                                               | 6.35  | 131.28   |
| IP100322707 | Q61687  | Atrx    | Alpha Thalassemia/Mental Retardation Syndrome X-Linked Homolog         | 6.30  | 278.59   |
| IP100221863 | Q8BHG9  | Cggbp1  | Cgg Triplet Repeat Binding Protein 1                                   | 9.14  | 18.76    |
| IP100354271 | Q4FZF3  | Ddx49   | Dead (Asp-Glu-Ala-Asp) Box Polypeptide 49                              | 9.02  | 54.09    |
| IP100471226 | Q9CYL7  | Abr1    | Activator Of Basal Transcription 1                                     | 10.02 | 30.66    |
| IP100331173 | Q3U9G9  | Lbr     | Lamin B Receptor                                                       | 9.43  | 71.44    |
| IP100137271 | Q8VE10  | Naa40   | N-Acetyltransferase 11                                                 | 7.15  | 27.10    |
| IP100918627 | Q8BHA0  | Ino80C  | Ino80 Complex Subunit C                                                | 10.03 | 20.41    |
| IP100311948 | Q923D4  | Sf3B5   | Splicing Factor 3B, Subunit 5                                          | 5.89  | 10.12    |
| IP100133008 | Q9CQS2  | Nop10   | Nop10 Ribonucleoprotein Homolog                                        | 10.01 | 7.71     |
| IP100378026 | Q7TSZ8  | Nacc1   | Nucleus Accumbens Associated 1                                         | 5.51  | 66.54    |
| IP101008109 | Q9Z248  | Aebp2   | Ae Binding Protein 2                                                   | 5.18  | 52.83    |
| IP100128056 | Q91WE3  | Rpp25   | Ribonuclease P 25 Subunit                                              | 9.26  | 21.04    |
| IP100647978 | Q3VOC5  | Usp48   | Ubiquitin Specific Peptidase 48                                        | 5.89  | 120.63   |
| IP100125261 | Q9WUV0  | Orc5L   | Origin Recognition Complex, Subunit 5-Like                             | 8.23  | 50.22    |
| IP100139168 | Q3TF18  | Parp1   | Poly (Adp-Ribose) Polymerase Family, Member 1                          | 9.08  | 112.71   |
| IP100462291 | P30681  | Hmgb2   | High mobility group protein B2                                         | 7.04  | 24.03    |
| IP100515403 | Q5SVQ0  | Myst2   | Myst Histone Acetyltransferase 2                                       | 8.91  | 70.64    |
| IP100132006 | Q9CPU5  | Rbpms   | Rna Binding Protein Gene With Multiple Splicing                        | 5.97  | 24.29    |
| IP100124810 | Q62388  | Atm     | Ataxia Telangiectasia Mutated Homolog                                  | 6.43  | 349.42   |
| IP100470092 | Q3V1H1  | Ckap2   | Cytoskeleton Associated Protein 2                                      | 9.27  | 74.03    |
| IP100119896 | O54946  | Dnajb6  | Dnaj Homolog, Subfamily B, Member 6                                    | 9.39  | 39.68    |
| IP100123842 | P97304  | Polr1D  | Polymerase (Rna) I Polypeptide D                                       | 6.43  | 15.07    |
| IP100120767 | Q07832  | Plk1    | Polo-Like Kinase 1                                                     | 8.93  | 68.30    |
| IP100132267 | P31266  | Rbpj    | Recombination Signal Binding Protein For Immunoglobulin Kappa J Region | 8.43  | 58.54    |
| IP100133955 | P62305  | Snrpe   | Small Nuclear Ribonucleoprotein E                                      | 9.46  | 10.80    |
| IP100755119 | Q4QQR6  | Morc3   | Microrchidia 3                                                         | 5.50  | 106.50   |
| IP100113870 | P17918  | Pcna    | Proliferating Cell Nuclear Antigen                                     | 4.66  | 28.78    |
| IP100310646 | Q8BTU1  | Gti3    | Gene Trap Locus 3                                                      | 9.78  | 22.75    |
| IP100115552 | O08740  | Polr2J  | Polymerase (Rna) II Polypeptide J                                      | 5.59  | 13.25    |
| IP100420541 | Q6ZPR5  | Smpd4   | Sphingomyelin Phosphodiesterase 4                                      | 8.38  | 93.28    |
| IP100133880 | Q9CQJ4  | Rnf2    | Ring Finger Protein 2                                                  | 6.38  | 37.62    |
| IP100753701 | Q5PSV9  | Mdc1    | Mediator Of Dna Damage Checkpoint 1                                    | 5.10  | 184.67   |
| IP100136186 | Q8CIL4  | Setd6   | Set Domain Containing 6                                                | 9.85  | 31.34    |
| IP100225633 | P11031  | Sub1    | Activated Rna Polymerase II Transcriptional Coactivator P15            | 9.60  | 14.30    |
| IP100480329 | Q8CHI8  | Ep400   | E1A Binding Protein P400                                               | 9.23  | 337.18   |
| IP100122594 | Q8CJF7  | Ahctf1  | At Hook Containing Transcription Factor 1                              | 6.12  | 247.65   |
| IP100316343 | Q3UJN9  | Coil    | Riken Cdna 2210409E12 Gene                                             | 9.26  | 62.23    |
| IP100112473 | P11103  | Parp1   | Poly (Adp-Ribose) Polymerase Family, Member 1                          | 9.05  | 112.97   |
| IP100118590 | Q80ZM5  | H1Fx    | H1 Histone Family, Member X                                            | 11.22 | 20.15    |
| IP100856575 | Q9QWT9  | Kifc1   | Kinesin Family Member C1                                               | 8.95  | 74.15    |
| IP100114052 | P27048  | Snrpb   | Small Nuclear Ribonucleoprotein B                                      | 10.91 | 23.66    |
| IP100345676 | A2AJK6  | Chd7    | Chromodomain Helicase Dna Binding Protein 7                            | 6.05  | 334.06   |
| IP100856974 | P56546  | Ctbp2   | C-Terminal Binding Protein 2                                           | 6.47  | 48.96    |
| IP100121431 | Q60848  | Hells   | Helicase, Lymphoid Specific                                            | 8.20  | 95.13    |
| IP100943363 | Q91WT4  | Dnajc17 | Dnaj Homolog, Subfamily C, Member 17                                   | 8.35  | 34.50    |
| IP100308283 | Q8BHJ5  | Tbl1Xr1 | Transducin (Beta)-Like 1X-Linked Receptor 1                            | 5.33  | 55.66    |
| IP100113232 | Q08288  | Lyar    | Ly1 Antibody Reactive Clone                                            | 9.52  | 43.74    |
| IP100114069 | P33610  | Prim2   | Dna Primase, P58 Subunit                                               | 8.47  | 58.41    |
| IP100124973 | P52293  | Rpl38   | Similar To Ribosomal Protein L38                                       | 5.49  | 67.80    |
| IP100454050 | Q62383  | Supt5H  | Suppressor Of Ty 5 Homolog                                             | 4.83  | 199.09   |
| IP100408243 | Q8R2K3  | Ssbp1   | Single-Stranded Dna Binding Protein 1                                  | 9.78  | 17.16    |

**pI:** isoelectric point      **Mw:** molecular weight (kDa)

| Protein ID  | Uniprot | Symbol   | Protein name                                                 | pI    | Mw (kDa) |
|-------------|---------|----------|--------------------------------------------------------------|-------|----------|
| IP100123947 | P97329  | Kif20A   | Kinesin Family Member 20A                                    | 6.55  | 99.88    |
| IP100139957 | P61965  | Wdr5     | Wd Repeat Domain 5                                           | 8.54  | 36.59    |
| IP100123724 | Q8VDS4  | Rprd1A   | Regulation Of Nuclear Pre-Mrna Domain Containing 1A          | 7.14  | 35.57    |
| IP100555055 | Q3THW5  | H2AFV    | H2A Histone Family, Member V                                 | 10.58 | 13.38    |
| IP100451536 | Q3UHX0  | Nol8     | Nucleolar Protein 8                                          | 6.12  | 128.64   |
| IP100408664 | Q4QY64  | Atad5    | Atpase Family, Aaa Domain Containing 5                       | 9.06  | 203.91   |
| IP100620362 | Q8R081  | Hnmp1    | Heterogeneous Nuclear Ribonucleoprotein L                    | 8.33  | 63.96    |
| IP100128254 | Q91WM1  | Strbp    | Spermatid Perinuclear Rna Binding Protein                    | 8.91  | 73.70    |
| IP100129466 | P83917  | Cbx1     | Similar To Heterochromatin Protein 1 Beta                    | 4.85  | 21.42    |
| IP100122696 | Q60972  | Rbbp4    | Retinoblastoma Binding Protein 4                             | 4.74  | 47.52    |
| IP100396739 | Q91ZW3  | Smarca5  | Sucrose Nonfermenting Protein 2 Homolog                      | 8.35  | 121.63   |
| IP100227539 | Q8BZH4  | Pogz     | Pogo Transposable Element With Znf Domain                    | 7.39  | 154.91   |
| IP100828218 | Q9QX47  | Son      | Son Dna Binding Protein                                      | 5.46  | 265.52   |
| IP100125745 | Q924K8  | Mta3     | Metastasis Associated 3                                      | 9.05  | 67.08    |
| IP100228616 | P43275  | Hist1H1A | Histone Cluster 1, H1A                                       | 10.93 | 21.65    |
| IP100668766 | Q571H0  | Urb1     | Urb1 Ribosome Biogenesis 1 Homolog                           | 6.50  | 254.61   |
| IP100230394 | P14733  | Lmn1     | Lamin B1                                                     | 5.11  | 66.34    |
| IP100108204 | P70353  | Nfyc     | Nuclear Transcription Factor-Y Gamma                         | 4.86  | 37.25    |
| IP100553815 | P60762  | Morf4L1  | Mortality factor 4-like protein 1                            | 9.34  | 41.49    |
| IP100115257 | Q99JF8  | Pslp1    | Pc4 And Sfrs1 Interacting Protein 1                          | 9.15  | 59.70    |
| IP100136207 | P08775  | Poi2A    | Polymerase (Rna) II Polypeptide A                            | 7.02  | 217.18   |
| IP100556837 | Q04692  | Smarca1  | Atp-Dependent Helicase Smarca1                               | 5.48  | 116.45   |
| IP100126176 | Q9WVM1  | Racgap1  | Rac Gtpase-Activating Protein 1                              | 8.78  | 70.16    |
| IP100817029 | Q922P9  | Glyr1    | Glyoxylate Reductase 1 Homolog                               | 9.31  | 59.72    |
| IP100312128 | Q62318  | Trim28   | Tripartite Motif-Containing 28                               | 5.52  | 88.72    |
| IP100625995 | Q8CHY6  | Gatad2A  | Gata Zinc Finger Domain-Containing Protein 2A                | 9.91  | 67.33    |
| IP100114232 | Q58E49  | Hdac1    | Histone Deacetylase Hd1                                      | 5.31  | 55.07    |
| IP100395196 | Q9CZ91  | Srfbp1   | Serum Response Factor Binding Protein 1                      | 9.56  | 48.75    |
| IP100123755 | Q61686  | Cbx5     | Chromobox Homolog 5                                          | 5.71  | 22.19    |
| IP100132576 | Q9CQI7  | Snrpb2   | U2 Small Nuclear Ribonucleoprotein B                         | 9.72  | 25.32    |
| IP100122383 | Q921Y2  | Imp3     | Imp3, U3 Small Nucleolar Ribonucleoprotein, Homolog          | 9.54  | 21.78    |
| IP100460668 | Q3TKT4  | Smarca4  | Transcription Activator Brg1                                 | 8.00  | 181.43   |
| IP100126191 | P21619  | Lmn2     | Lamin B2                                                     | 5.36  | 66.79    |
| IP100118172 | O70422  | Gtf2H4   | General Transcription Factor II H, Polypeptide 4             | 9.12  | 52.22    |
| IP100114491 | P11440  | Cdk1     | Cell Division Cycle 2 Homolog A                              | 8.40  | 34.11    |
| IP100222509 | Q8BK67  | Rcc2     | Regulator Of Chromosome Condensation 2                       | 8.97  | 55.98    |
| IP100990173 | P13864  | Dnmt1    | Dna Methyltransferase 1                                      | 7.92  | 183.19   |
| IP100453800 | Q8K327  | Zfp828   | Zinc Finger Protein 828                                      | 8.08  | 87.56    |
| IP100133532 | Q9CRA8  | Exosc5   | Exosome Component 5                                          | 7.52  | 25.19    |
| IP100153607 | Q8R2M2  | Dnmt2    | Deoxynucleotidyltransferase, Terminal, Interacting Protein 2 | 6.07  | 84.28    |
| IP100317722 | Q9JH44  | Dmap1    | Dna Methyltransferase 1-Associated Protein 1                 | 9.51  | 53.13    |
| IP100110952 | Q04841  | Mpg      | N-Methylpurine-Dna Glycosylase                               | 9.53  | 36.47    |
| IP100132901 | Q9CQQ8  | Lsm7     | U6 Snrna-Associated Sm-Like Protein Lsm7                     | 5.10  | 11.64    |
| IP100263048 | Q3TH77  | Numa1    | Nuclear Mitotic Apparatus Like Protein 1                     | 5.03  | 84.21    |
| IP100187240 | Q9CWX9  | Ddx47    | Dead (Asp-Glu-Ala-Asp) Box Polypeptide 47                    | 9.19  | 50.51    |
| IP100320741 | Q61164  | Ctcf     | Ccctc-Binding Factor                                         | 6.45  | 83.75    |
| IP100127554 | Q542P8  | Emg1     | Emg1 Nucleolar Protein Homolog                               | 9.10  | 26.97    |
| IP100776048 | Q80YV3  | Trap     | Transformation/Transcription Domain-Associated Protein       | 8.76  | 291.56   |
| IP100169521 | Q3V1V3  | Esf1     | Nucleolar Pre-Rna Processing Protein, Homolog                | 4.96  | 98.05    |
| IP100132900 | Q9CR08  | Pop4     | Processing Of Precursor 4, Ribonuclease P/Mrp Family         | 9.76  | 25.64    |
| IP100461832 | Q8VCY6  | Utp6     | U3 Small Nucleolar Rna-Associated Protein 6 Homolog          | 7.59  | 70.43    |
| IP100337955 | Q80UW8  | Poi2E    | Polymerase (Rna) II Polypeptide E                            | 5.69  | 24.57    |
| IP100131909 | Q9CPS7  | Pno1     | Partner Of Nob1 Homolog                                      | 9.80  | 27.45    |
| IP100330133 | Q6PAL0  | Bend3    | Ben Domain Containing 3                                      | 5.39  | 94.16    |
| IP100850851 | Q5XG71  | Utp20    | Small Subunit Processome Component 20 Homolog                | 8.33  | 317.74   |
| IP100131130 | Q64127  | Trim24   | Tripartite Motif-Containing 24                               | 6.66  | 116.66   |
| IP100223570 | Q8BGA5  | Krr1     | Krr-R Motif-Containing Protein 1                             | 9.80  | 43.54    |
| IP100227720 | Q7TNV0  | Dek      | Protein Dek                                                  | 6.50  | 43.03    |
| IP100131067 | Q9Z2D8  | Mbd3     | Methyl-Cpg Binding Domain Protein 3                          | 5.64  | 32.17    |
| IP100323660 | Q9Z2N8  | Actl6A   | Actin-Like 6A                                                | 5.39  | 47.32    |
| IP100848926 | Q9D868  | Ppih     | Peptidyl Prolyl Isomerase H                                  | 8.29  | 20.46    |
| IP100133550 | Q9CRB2  | Nhp2     | Nhp2 Ribonucleoprotein Homolog                               | 8.68  | 17.25    |
| IP100131725 | Q9CPP0  | Npm3     | Nucleoplasmin 3                                              | 4.71  | 18.89    |
| IP100117932 | Q60520  | Sin3A    | Histone Deacetylase Complex Subunit Sin3A                    | 6.82  | 145.09   |
| IP100120572 | Q9JIH2  | Nup50    | Nucleoporin 50                                               | 5.94  | 49.49    |
| IP100330709 | Q80XC6  | Cn102    | Upf0614 Protein C14Orf102 Homolog                            | 8.15  | 133.47   |
| IP100310578 | Q9JIX0  | Eny2     | Enhancer Of Yellow 2 Homolog                                 | 9.39  | 11.53    |
| IP100338515 | Q9CSU0  | Rprd1B   | Regulation Of Nuclear Pre-Mrna Domain Containing 1B          | 5.72  | 36.88    |
| IP100129701 | Q6PAC3  | Dcaf13   | Wd Repeats And Sof Domain Containing 1                       | 9.41  | 51.46    |
| IP100126396 | Q61881  | Mcm7     | Minichromosome Maintenance Deficient 7                       | 5.99  | 81.08    |
| IP100551454 | Q6NS46  | Pdcd11   | Programmed Cell Death 11                                     | 8.92  | 207.65   |
| IP100153791 | Q8BJV5  | Nol11    | Nucleolar Protein 11                                         | 5.61  | 80.82    |
| IP100138378 | P63082  | Atp5V0C  | Atpase, H+ Transporting, Lysosomal V0 Subunit C              | 9.10  | 15.81    |
| IP100118948 | Q00422  | Gabpa    | Ga Repeat Binding Protein, Alpha                             | 4.91  | 51.34    |
| IP100132473 | Q9CQF3  | Nudt21   | Nudix -Type Motif 21                                         | 8.85  | 26.11    |
| IP100132099 | Q9CPW7  | Zmat2    | Zinc Finger, Matrin Type 2                                   | 9.08  | 23.61    |
| IP100133061 | Q9CQT2  | Rbm7     | Rna Binding Motif Protein 7                                  | 9.37  | 30.15    |
| IP100896604 | Q80Y44  | Ddx10    | Dead (Asp-Glu-Ala-Asp) Box Polypeptide 10                    | 7.61  | 100.74   |
| IP100129388 | Q80U72  | Scrib    | Scribbled Homolog                                            | 5.04  | 174.06   |
| IP100943994 | P62307  | Snrpf    | Small Nuclear Ribonucleoprotein F                            | 4.63  | 9.59     |
| IP100882020 | Q3UKV4  | Dpf2     | D4, Zinc And Double Phd Fingers Family 2                     | 6.19  | 44.33    |
| IP100395166 | Q8VHZ7  | Imp4     | Imp4, U3 Small Nucleolar Ribonucleoprotein, Homolog          | 9.35  | 33.66    |
| IP100126762 | P67871  | Csnk2B   | Casein Kinase 2, Beta Polypeptide                            | 5.33  | 24.94    |
| IP100653266 | Q3UI84  | Rfc4     | Replication Factor C 4                                       | 8.78  | 40.92    |
| IP100987184 | Q9D0T1  | Nhp2L1   | Nhp2 Non-Histone Chromosome Protein 2-Like 1                 | 8.72  | 14.04    |
| IP100283671 | Q9CY57  | Fop      | Friend Of Prmt1 Protein                                      | 12.24 | 26.58    |
| IP100123762 | Q3U6D2  | Rcc1     | Regulator Of Chromosome Condensation 1                       | 8.34  | 44.94    |
| IP100131850 | Q9CPR8  | Ndn2     | Necdin-Like 2                                                | 9.10  | 31.46    |
| IP100111343 | Q9QZH3  | Ppih     | Peptidylprolyl Isomerase E                                   | 5.41  | 33.45    |
| IP100130246 | Q91YK2  | Rrp1B    | Ribosomal Rna Processing 1 Homolog B                         | 9.75  | 80.58    |
| IP100132770 | Q9D0N7  | Chaf1B   | Chromatin Assembly Factor 1, Subunit B                       | 6.12  | 63.13    |
| IP100226384 | Q8BX09  | Rbbp5    | Retinoblastoma Binding Protein 5                             | 4.96  | 59.10    |
| IP100831626 | E9Q456  | Tpm1     | Tropomyosin Alpha-1 Chain                                    | 4.72  | 28.67    |
| IP100229072 | Q60953  | Pml      | Promyelocytic Leukemia                                       | 5.42  | 98.24    |
| IP100555042 | Q5DW34  | Ehmt1    | Euchromatic Histone-Lysine N-Methyltransferase 1             | 5.52  | 142.00   |
| IP100133839 | Q9QWF0  | Chaf1A   | Chromatin Assembly Factor 1, Subunit A                       | 5.28  | 101.94   |
| IP100986822 | Q8C590  | Nfya     | Nuclear Transcription Factor-Y Beta                          | 4.48  | 24.59    |

| Protein ID  | Uniprot | Symbol    | Protein name                                            | pI    | Mv (kDa) |
|-------------|---------|-----------|---------------------------------------------------------|-------|----------|
| IP100607076 | Q542V3  | Sfrs4     | Splicing Factor, Arginine/Serine-Rich 4                 | 11.37 | 56.25    |
| IP100133385 | Q8VHN8  | Nudt16L1  | Nudix -Type Motif 16-Like 1                             | 9.30  | 23.41    |
| IP100170232 | Q8K4L3  | Svll      | Supervillin                                             | 6.44  | 243.16   |
| IP100113449 | P59941  | Sirt6     | Sirtuin 6                                               | 9.04  | 36.92    |
| IP100109615 | Q9CWU9  | Nup37     | Nucleoporin 37                                          | 5.67  | 36.73    |
| IP100133594 | Q9D1C9  | Rrp7A     | Ribosomal Rna Processing 7 Homolog A                    | 9.51  | 32.40    |
| IP100132580 | Q9CQI9  | Med30     | Mediator Complex Subunit 30                             | 8.45  | 20.36    |
| IP100109326 | Q9EP97  | Senp3     | Sumo/Sentrin Specific Peptidase 3                       | 8.98  | 64.40    |
| IP100116926 | Q3U063  | Zfp281    | Zinc Finger Protein 281                                 | 8.77  | 96.68    |
| IP100665571 | Q8R323  | Rfc3      | Replication Factor C 3                                  | 8.70  | 40.53    |
| IP100223713 | P15864  | Hist1H1C  | Histone Cluster 1, H1C                                  | 11.00 | 21.14    |
| IP100131513 | Q91X20  | Ash2L     | Absent, Small, Or Homeotic-Like                         | 5.44  | 68.25    |
| IP100221414 | Q8BFQ4  | Wdr82     | Wd Repeat Domain Containing 82                          | 7.59  | 35.08    |
| IP100622945 | Q9D982  | Arid2     | At Rich Interactive Domain 2                            | 7.87  | 16.31    |
| IP100128256 | Q91WMM3 | Rrp9      | U3 Small Nucleolar Rna-Interacting Protein 2            | 8.00  | 52.11    |
| IP100121437 | Q8VBV3  | Exosc2    | Exosome Component 2                                     | 7.06  | 32.63    |
| IP100875938 | Q3U114  | Kdm3B     | Kdm3B Lysine -Specific Demethylase 3B                   | 7.06  | 51.17    |
| IP100125662 | P97496  | Smarcc1   | Brg1-Associated Factor 155                              | 5.50  | 122.76   |
| IP100135971 | P39447  | Tjp1      | Tight Junction Protein 1                                | 6.18  | 194.74   |
| IP100970229 | Q9ER69  | Wtap      | Wilms' Tumour 1-Associating Protein                     | 5.17  | 44.18    |
| IP100321884 | Q9DBY8  | Nvl       | Nuclear Vcp-Like                                        | 6.02  | 94.48    |
| IP100321266 | Q8R326  | Pspc1     | Paraspeckle Protein 1                                   | 6.26  | 58.76    |
| IP100128522 | P14602  | Hspb1     | Heat Shock Protein 1                                    | 6.12  | 23.01    |
| IP100225719 | Q8C570  | Rae1      | Rae1 Rna Export 1 Homolog                               | 7.96  | 40.97    |
| IP100119581 | P35550  | Fbl       | Similar To Fibrillarin                                  | 10.25 | 34.31    |
| IP100124284 | Q923G2  | Poir2H    | Polymerase (Rna) Ii Polypeptide H                       | 4.50  | 17.01    |
| IP100323422 | Q9Z1B5  | Mad2L1    | Mad2 Mitotic Arrest Deficient-Like 1                    | 5.15  | 23.47    |
| IP100122218 | Q8R1J3  | Zcchc9    | Zinc Finger, Cchc Domain Containing 9                   | 9.38  | 30.76    |
| IP100420870 | Q8CGY8  | Ogt       | O-Linked N-Acetylglucosamine Transferase                | 6.23  | 116.82   |
| IP100330623 | Q8BMC4  | Cn021     | Pumilio Domain-Containing Protein C14Orf21 Homolog      | 6.86  | 70.05    |
| IP100119201 | Q9DB96  | Ngdn      | Neuroguidin, Eif4E Binding Protein                      | 9.59  | 35.53    |
| IP100134346 | Q88796  | Rpp30     | Ribonuclease P/Mrp 30 Subunit                           | 9.21  | 29.34    |
| IP100453849 | Q9D0L8  | Rnmt      | Rna (Guanine-7-) Methyltransferase                      | 6.12  | 53.29    |
| IP100226227 | Q8C6B9  | Rps19Bp1  | Ribosomal Protein S19 Binding Protein 1                 | 10.03 | 15.98    |
| IP100226872 | Q8C845  | Efh2d     | Ef-Hand Domain-Containing Protein D2                    | 5.07  | 26.80    |
| IP100469331 | Q8R4R6  | Nup35     | Nucleoporin Nup35                                       | 9.27  | 34.79    |
| IP100132041 | Q78WZ7  | Tv1stnb   | Predicted Gene 8670                                     | 5.83  | 36.72    |
| IP100458908 | Q9DAW6  | Prpf4     | Prp4 Pre-Mrna Processing Factor 4 Homolog               | 6.86  | 58.37    |
| IP100454015 | Q8CH02  | Sf4       | Splicing Factor 4                                       | 7.22  | 72.65    |
| IP100229475 | Q02257  | Jup       | Junction Plakoglobin                                    | 5.75  | 81.80    |
| IP100856474 | Q9DBA9  | Gtf2H1    | General Transcription Factor Ii H, Polypeptide 1        | 8.89  | 61.72    |
| IP100130343 | Q3U6P5  | Hnmpc     | Heterogeneous Nuclear Ribonucleoprotein C               | 6.88  | 36.91    |
| IP100338452 | P08122  | Col4A2    | Collagen, Type Iv, Alpha 2                              | 8.16  | 149.09   |
| IP100136252 | Q4VBE8  | Wdr18     | Wd Repeat Domain 18                                     | 6.42  | 47.21    |
| IP100117687 | P59708  | Sf3B14    | Pre-Mrna Branch Site Protein P14                        | 9.41  | 14.58    |
| IP100988759 | Q0C5S0  | Tcof1     | Treacher Collins Franceschetti Syndrome 1, Homolog      | 6.34  | 102.15   |
| IP100229021 | Q8CEC0  | Nup88     | Nucleoporin 88                                          | 5.87  | 84.94    |
| IP100350396 | Q9Z0H3  | Smarcb1   | Brg1-Associated Factor 47                               | 5.86  | 44.14    |
| IP100954304 | P17095  | Hmga1     | High Mobility Group At-Hook 1                           | 10.31 | 11.48    |
| IP100109419 | P33174  | Kif4      | Kinesin Family Member 4                                 | 6.30  | 139.52   |
| IP100331342 | Q3UKJ7  | Smu1      | Smu-1 Suppressor Of Mec-8 And Unc-52 Homolog            | 6.73  | 57.41    |
| IP100121596 | Q99PV0  | Prpf8     | Pre-Mrna Processing Factor 8                            | 8.95  | 273.49   |
| IP100622387 | Q8V133  | Taf9      | Tata Box Binding Protein-Associated Factor 9            | 7.68  | 28.98    |
| IP100133555 | Q9CXX8  | Nip7      | Nuclear Import 7 Homolog                                | 8.35  | 20.45    |
| IP100466593 | Q8BTV3  | Exosc6    | Exosome Component 6                                     | 5.87  | 28.37    |
| IP100377930 | Q7TMY4  | Thoc7     | Tho Complex 7 Homolog                                   | 5.46  | 23.71    |
| IP100336965 | Q8K301  | Ddx52     | Dead (Asp-Glu-Ala-Asp) Box Polypeptide 52               | 9.59  | 67.47    |
| IP100323600 | Q89053  | Coro1A    | Coronin, Actin Binding Protein 1A                       | 6.05  | 50.86    |
| IP100648295 | Q6ZQ88  | Kdm1A     | Similar To Amine Oxidase (Flavin Containing) Domain 2   | 6.11  | 92.85    |
| IP100132936 | Q80X41  | Vrk1      | Vaccinia Related Kinase 1                               | 9.08  | 49.74    |
| IP100762582 | Q9DBY0  | Foxp4     | Forkhead Box P4                                         | 6.61  | 85.98    |
| IP100652831 | Q3UL36  | Arglu1    | Arginine And Glutamate Rich 1                           | 10.35 | 32.89    |
| IP100165762 | Q8R3C6  | Rbm19     | Rna Binding Motif Protein 19                            | 6.17  | 106.08   |
| IP100463344 | Q6NZB0  | Dnajc8    | Dnaj Homolog, Subfamily C, Member 8                     | 9.05  | 29.68    |
| IP100177202 | P59235  | Nup43     | Nucleoporin 43                                          | 5.13  | 41.99    |
| IP100129468 | P23198  | Cbx3      | Chromobox Homolog 3                                     | 5.13  | 20.86    |
| IP100751713 | Q8CGP2  | Hist1H2Bp | Histone Cluster 1, H2Bp                                 | 10.32 | 13.86    |
| IP100320034 | Q8CFI7  | Poir2B    | Polymerase (Rna) Ii Polypeptide B                       | 6.44  | 133.91   |
| IP100119123 | P81269  | Atf1      | Predicted Gene 1862                                     | 8.45  | 29.24    |
| IP100132019 | Q9CQ49  | Ncbp2     | Nuclear Cap Binding Protein Subunit 2                   | 7.62  | 18.02    |
| IP100114941 | Q86644  | Bcl7C     | B-Cell Clil/Lymphoma 7C                                 | 5.14  | 23.44    |
| IP100132481 | Q9D0F6  | Rfc5      | Replication Factor C 5                                  | 7.67  | 38.10    |
| IP100323820 | Q3UJN1  | Mcm2      | Minichromosome Maintenance Deficient 2 Mitotin          | 5.51  | 103.15   |
| IP100315517 | Q8R2U0  | Seh1L     | Seh1-Like                                               | 8.30  | 39.77    |
| IP100226155 | Q4FK66  | Prpf38A   | Prp38 Pre-Mrna Processing Factor 38 Domain Containing A | 10.02 | 37.44    |
| IP100267629 | Q8K194  | Snrnp27   | Small Nuclear Ribonucleoprotein 27 (U4/U6.U5)           | 11.62 | 18.89    |
| IP100461532 | Q8R480  | Nup85     | Nucleoporin 85                                          | 5.37  | 74.78    |
| IP100889910 | Q8BR65  | Suds3     | Suppressor Of Defective Silencing 3 Homolog             | 5.55  | 38.11    |
| IP100122220 | Q9JUT0  | Rcl1      | Rna Terminal Phosphate Cyclase-Like 1                   | 9.36  | 40.84    |
| IP100170394 | Q8JZX4  | Rbm17     | Predicted Gene 5880                                     | 5.65  | 45.30    |
| IP100123557 | Q9WMT5  | Ruvb2     | Ruvb-Like Protein 2                                     | 5.49  | 50.98    |
| IP100133801 | Q9D1J3  | Sarnp     | Sap Domain Containing Ribonucleoprotein                 | 6.34  | 23.40    |
| IP100124744 | Q9WUK4  | Rfc2      | Replication Factor C 2                                  | 6.04  | 38.72    |
| IP100129141 | Q9Z0H1  | Wdr46     | Wd Repeat Domain 46                                     | 9.79  | 69.05    |
| IP100323705 | Q9Z2V5  | Hdac6     | Histone Deacetylase 6                                   | 5.47  | 125.79   |
| IP100403414 | Q8K284  | Gtf3C1    | General Transcription Factor Iii C 1                    | 6.91  | 237.48   |
| IP100410804 | Q9CYI4  | Luc7L     | Luc7 Homolog-Like                                       | 9.90  | 43.93    |
| IP100124901 | Q9JMP3  | Arl6ip4   | Adp-Ribosylation Factor-Like 6 Interacting Protein 4    | 11.19 | 25.52    |
| IP100317298 | Q9CSN1  | Snw1      | Snw Domain Containing 1                                 | 9.49  | 61.34    |
| IP100122350 | Q62189  | Snrpa     | Predicted Gene 8655                                     | 9.81  | 31.84    |
| IP100755892 | Q9Z130  | Hnrpd1    | Heterogeneous Nuclear Ribonucleoprotein D-Like          | 6.85  | 33.56    |
| IP100128991 | Q8BFV2  | Pcid2     | Pci Domain Containing 2                                 | 8.78  | 46.00    |
| IP100127415 | Q61937  | Npm1      | Predicted Gene 6477                                     | 4.62  | 32.56    |
| IP100407339 | P62806  | H4        | Histone H4                                              | 11.36 | 11.24    |
| IP100225214 | Q8BTT6  | Diexf     | Digestive Organ Expansion Factor Homolog                | 5.51  | 88.82    |
| IP100125899 | Q02248  | Ctnnb1    | Catenin, Beta 1                                         | 5.53  | 85.47    |
| IP100654005 | Q3UUX3  | Poir2C    | Polymerase (Rna) Ii Polypeptide C                       | 5.13  | 37.75    |

| Protein ID  | Uniprot | Symbol  | Protein name                                             | pI    | Mw (kDa) |
|-------------|---------|---------|----------------------------------------------------------|-------|----------|
| IPI00310857 | Q92119  | Exosc4  | Exosome Component 4                                      | 5.75  | 26.12    |
| IPI00469994 | Q69ZQ2  | Isy1    | Isy1 Splicing Factor Homolog                             | 5.15  | 32.99    |
| IPI00776010 | Q6R165  | Tbp     | Tata Box Binding Protein                                 | 9.80  | 34.71    |
| IPI00118360 | Q9DAA6  | Exosc1  | Exosome Component 1                                      | 8.51  | 21.42    |
| IPI00110931 | Q9CY66  | Gar1    | Gar1 Ribonucleoprotein Homolog                           | 11.03 | 23.47    |
| IPI00110856 | P56183  | Rrp1    | Ribosomal Rna Processing 1 Homolog                       | 5.03  | 54.78    |
| IPI00719871 | Q3UJ16  | Noic1   | Nucleolar And Coiled-Body Phosphoprotein 1               | 9.35  | 73.56    |
| IPI00230150 | P62309  | Snrpg   | Predicted Gene 8186                                      | 8.98  | 8.50     |
| IPI00320303 | Q8R0G9  | Nup133  | Nucleoporin 133                                          | 5.06  | 128.62   |
| IPI00322206 | Q99KK2  | Cmas    | Cytidine Monophospho-N-Acetylneuraminic Acid Synthetase  | 8.37  | 48.06    |
| IPI00985938 | Q3UFY0  | Rrp36   | Ribosomal Rna Processing Protein 36 Homolog              | 10.57 | 28.59    |
| IPI00224152 | P28352  | Apex1   | Apurinic/Apyrimidinic Endonuclease 1                     | 8.20  | 35.36    |
| IPI00462934 | Q3U0V1  | Khsrp   | Kh-Type Splicing Regulatory Protein                      | 6.90  | 76.78    |
| IPI00410764 | Q80VY9  | Dhx33   | Deah (Asp-Glu-Ala-His) Box Polypeptide 33                | 9.11  | 78.35    |
| IPI00316184 | Q9D287  | Bcas2   | Breast Carcinoma Amplified Sequence 2                    | 5.48  | 26.00    |
| IPI00269662 | Q8BG05  | Hnrnpa3 | Heterogeneous Nuclear Ribonucleoprotein A3               | 9.10  | 39.65    |
| IPI00453821 | Q99P88  | Nup155  | Nucleoporin 155                                          | 5.77  | 155.12   |
| IPI00221951 | Q8BHS3  | Rbm22   | Rna Binding Motif Protein 22                             | 8.83  | 46.76    |
| IPI00115650 | Q9CXW3  | Cacybp  | Calcyclin Binding Protein                                | 7.84  | 26.38    |
| IPI00226889 | Q8C7V3  | Utp15   | Utp15, U3 Small Nucleolar Ribonucleoprotein, Homolog     | 8.93  | 59.24    |
| IPI00119220 | P62317  | Snrpd2  | Predicted Gene 5449                                      | 9.92  | 13.40    |
| IPI00319231 | P62843  | Rps15   | 40S Ribosomal Protein S15                                | 10.39 | 16.91    |
| IPI00989397 | Q6GSS7  | H2A2A   | Histone H2A Type 2-A                                     | 10.90 | 13.96    |
| IPI00322749 | P62315  | Snrpd1  | Small Nuclear Ribonucleoprotein D1                       | 11.56 | 13.28    |
| IPI00121136 | Q9JIX8  | Acin1   | Apoptotic Chromatin Condensation Inducer 1               | 5.71  | 150.72   |
| IPI00649685 | Q99JR8  | Smardc2 | Brg1-Associated Factor 60B                               | 9.66  | 59.09    |
| IPI00136015 | Q9CTH6  | Fcf1    | Fcf1 Small Subunit (Ssu) Processome Component Homolog    | 9.71  | 23.34    |
| IPI00467841 | Q3UKW2  | Calml1  | Calmodulin                                               | 4.21  | 21.56    |
| IPI00108338 | P25206  | Mcm3    | Minichromosome Maintenance Deficient 3                   | 5.37  | 91.42    |
| IPI00311260 | Q8K4F6  | Nsun5   | Nol1/Nop2/Sun Domain Family, Member 5                    | 9.33  | 50.90    |
| IPI00857497 | Q8BQZ5  | Cpsf4   | Cleavage And Polyadenylation Specific Factor 4           | 8.83  | 23.65    |
| IPI00311203 | P51432  | Plcb3   | Phospholipase C, Beta 3                                  | 5.70  | 139.36   |
| IPI00396812 | Q7TQK4  | Exosc3  | Exosome Component 3                                      | 8.37  | 29.42    |
| IPI00330054 | Q8BHY2  | Noc4L   | Nucleolar Complex Associated 4 Homolog                   | 6.29  | 58.68    |
| IPI00170008 | P57784  | Snrpa1  | Small Nuclear Ribonucleoprotein Polypeptide A'           | 8.72  | 28.23    |
| IPI00119776 | Q9J113  | Utp3    | Small Subunit Processome Component, Homolog              | 5.44  | 53.40    |
| IPI00221528 | Q8BFZ3  | Actbl2  | Actin, Beta-Like 2                                       | 5.30  | 42.00    |
| IPI00134621 | P62827  | Ran     | Member Ras Oncogene Family                               | 7.20  | 24.29    |
| IPI00988949 | P84089  | Erh     | Enhancer of rudimentary homolog                          | 5.62  | 12.13    |
| IPI00119760 | Q5RJG1  | Noi10   | Nucleolar Protein 10                                     | 8.39  | 80.08    |
| IPI00123565 | Q9JKX4  | Aatf    | Apoptosis Antagonizing Transcription Factor              | 4.81  | 59.35    |
| IPI00128230 | Q9R190  | Mta2    | Metastasis-Associated Gene Family, Member 2              | 9.71  | 75.03    |
| IPI00454123 | Q6NXI6  | Rprd2   | Regulation Of Nuclear Pre-Mrna Domain Containing 2       | 7.24  | 156.59   |
| IPI00337844 | Q9ERU9  | Ranbp2  | Ran Binding Protein 2                                    | 5.82  | 341.12   |
| IPI00113635 | Q9ESX5  | Dkc1    | Dyskeratosis Congenita 1                                 | 9.34  | 57.27    |
| IPI00121434 | Q8VC52  | Rbpm5   | RNA-binding protein with multiple splicing 2             | 8.51  | 22.46    |
| IPI00309398 | Q52KC3  | Mcm5    | Minichromosome Maintenance Deficient 5                   | 8.57  | 82.41    |
| IPI00282848 | P84244  | H33     | Histone H3.3                                             | 11.27 | 15.20    |
| IPI00353579 | Q5S5I6  | Utp18   | Utp18, Small Subunit (Ssu) Processome Component, Homolog | 8.95  | 61.22    |
| IPI00353796 | Q8R5K4  | Nol6    | Nucleolar Protein Family 6                               | 6.33  | 129.23   |
| IPI00133985 | P60122  | Ruvb1   | Ruvb-Like Protein 1                                      | 6.02  | 50.21    |
| IPI00120162 | Q60737  | Csnk2A1 | Casein Kinase 2, Alpha 1 Polypeptide                     | 7.29  | 45.13    |
| IPI00461621 | Q6PE01  | Snrmp40 | Small Nuclear Ribonucleoprotein 40                       | 8.34  | 39.28    |
| IPI00330019 | Q811S7  | Ubp1    | Upstream Binding Protein 1                               | 5.85  | 60.21    |
| IPI00989277 | Q3UUW5  | Ccnh    | Cyclin H                                                 | 8.90  | 38.05    |
| IPI00903356 | Q8BIQ5  | Cstf2   | Cleavage Stimulation Factor, 3' Pre-Rna Subunit 2        | 6.38  | 61.21    |
| IPI00678657 | Q8QZY9  | Sf3B4   | Splicing Factor 3B, Subunit 4                            | 8.57  | 44.22    |
| IPI00308402 | Q64012  | Raly    | RNA-binding protein Raly                                 | 8.95  | 33.19    |
| IPI00225249 | Q8BTV2  | Cpsf7   | Cleavage And Polyadenylation Specific Factor 7           | 7.82  | 52.01    |
| IPI00132578 | Q9D0I8  | Mito4   | Mrna Turnover 4                                          | 8.63  | 27.55    |
| IPI00129873 | P62313  | Lsm6    | Lsm6 Homolog, U6 Small Nuclear Rna Associated            | 9.61  | 9.13     |
| IPI00130114 | Q91YD3  | Dcp1A   | Dcp1 Decapping Enzyme Homolog A                          | 6.51  | 65.22    |
| IPI00408781 | Q6NZL1  | Dhx37   | Deah (Asp-Glu-Ala-His) Box Polypeptide 37                | 8.97  | 128.33   |
| IPI00137433 | Q6P5D8  | Smchd1  | Smc Hinge Domain Containing 1                            | 6.89  | 225.52   |
| IPI01026945 | Q8CCS6  | Bcl2L2  | Bcl2-Like 2                                              | 5.13  | 32.17    |
| IPI00135475 | Q9QXS6  | Dbn1    | Drebrin 1                                                | 4.44  | 77.16    |
| IPI00229722 | Q80U93  | Nup214  | Nucleoporin 214                                          | 6.65  | 212.98   |
| IPI00387489 | Q4VBW5  | Exosc7  | Exosome Component 7                                      | 5.08  | 31.83    |
| IPI00122120 | Q8VCG3  | Wdr74   | Wd Repeat Domain 74                                      | 7.95  | 42.64    |
| IPI01026855 | Q99K43  | Prc1    | Protein Regulator Of Cytokinesis 1                       | 7.50  | 70.29    |
| IPI00118762 | Q54825  | Bysl    | Bystin-Like                                              | 7.65  | 49.78    |
| IPI00124677 | Q8VEJ4  | Nie1    | Notchiess Homolog 1                                      | 6.75  | 53.00    |
| IPI00111695 | Q9D8M4  | Rpl7L1  | Ribosomal Protein L7-Like 1                              | 10.64 | 28.54    |
| IPI00410937 | Q9CWZ3  | Rbm8A   | Rna Binding Motif Protein 8A                             | 5.83  | 19.76    |
| IPI00126338 | Q61033  | Tmpo    | Thymopoietin                                             | 8.35  | 75.04    |
| IPI00321597 | Q9DBD5  | Pelp1   | Proline, Glutamic Acid And Leucine Rich Protein 1        | 4.31  | 117.94   |
| IPI01008362 | Q61464  | Zfml    | Zinc Finger, Matrin-Like                                 | 6.46  | 218.13   |
| IPI00110363 | Q9EPU4  | Cpsf1   | Cleavage And Polyadenylation Specific Factor 1           | 5.97  | 160.82   |
| IPI00856171 | Q6PGH1  | Bud31   | Bud31 Homolog                                            | 8.53  | 11.90    |
| IPI00421085 | Q6NVF9  | Cpsf6   | Cleavage And Polyadenylation Specific Factor 6           | 6.66  | 59.15    |
| IPI00379513 | Q3TIX6  | Fubp3   | Far Upstream Element Binding Protein 3                   | 8.59  | 61.96    |
| IPI00276866 | Q8K224  | Nat10   | N-Acetyltransferase 10                                   | 8.57  | 115.42   |
| IPI00311509 | P58742  | Aaas    | Achalasia, Adrenocortical Insufficiency, Alacrimia       | 6.39  | 59.43    |
| IPI00321718 | Q35129  | Phb2    | Prohibitin 2                                             | 9.83  | 33.17    |
| IPI00109639 | Q9D753  | Exosc8  | Exosome Component 8                                      | 5.06  | 29.95    |
| IPI00923656 | Q9Z277  | Baz1B   | Bromodomain Adjacent To Zinc Finger Domain, 1B           | 8.81  | 170.65   |
| IPI00120790 | Q9DCE5  | Pak1ip1 | Pak1 Interacting Protein 1                               | 8.72  | 42.12    |
| IPI00109203 | Q9CWX3  | Cd2Bp2  | Cd2 Antigen Binding Protein 2                            | 4.48  | 37.69    |
| IPI00136251 | Q9QYJ0  | Dnaj2   | Dnaj Homolog, Subfamily A, Member 2                      | 6.01  | 45.41    |
| IPI00263106 | P62488  | Poir2G  | Polymerase (Rna) II Polypeptide G                        | 5.33  | 19.29    |
| IPI00321739 | Q9DBR0  | Akap8   | A Kinase Anchor Protein 8                                | 5.03  | 76.29    |
| IPI00227773 | P63087  | Ppp1Cc  | Protein Phosphatase 1, Catalytic Subunit, Gamma Isoform  | 6.14  | 36.85    |
| IPI00318550 | Q9CXY6  | Ilf2    | Interleukin Enhancer Binding Factor 2                    | 5.18  | 43.06    |
| IPI00874408 | Q08943  | Ssrp1   | Structure Specific Recognition Protein 1                 | 6.35  | 80.73    |
| IPI00318048 | Q9D6Z1  | Nop56   | Nop56 Ribonucleoprotein Homolog                          | 9.22  | 64.46    |
| IPI00118795 | Q54833  | Csnk2A2 | Casein Kinase 2, Alpha Prime Polypeptide                 | 8.64  | 41.22    |
| IPI00653709 | Q3UJW7  | Spin1   | Spindlin 1                                               | 6.65  | 29.91    |

| Protein ID  | Uniprot | Symbol    | Protein name                                               | pI    | Mw (kDa) |
|-------------|---------|-----------|------------------------------------------------------------|-------|----------|
| IP00119814  | Q9JHS9  | Cwc15     | Cwc15 Homolog                                              | 5.54  | 26.49    |
| IP00131056  | O88477  | Igf2Bp1   | Insulin-Like Growth Factor 2 Mrna Binding Protein 1        | 9.26  | 63.45    |
| IP01023295  | P52432  | Poir1C    | Polymerase (Rna) I Polypeptide C                           | 5.08  | 38.98    |
| IP000316740 | Q3U1J4  | Ddb1      | Damage Specific Dna Binding Protein 1                      | 5.14  | 126.85   |
| IP000918172 | Q9CPT5  | Nop16     | Nop16 Nucleolar Protein Homolog                            | 9.91  | 21.14    |
| IP000396728 | Q6P9R1  | Ddx51     | Dead (Asp-Glu-Ala-Asp) Box Polypeptide 51                  | 9.53  | 70.37    |
| IP00226149  | Q3TAJ5  | Rsl1D1    | Ribosomal L1 Domain Containing 1                           | 10.08 | 43.97    |
| IP00123376  | Q62241  | Snrpc     | U1 Small Nuclear Ribonucleoprotein C                       | 9.72  | 17.36    |
| IP000329840 | Q61550  | Rad21     | Rad21 Homolog                                              | 4.54  | 72.08    |
| IP00123949  | Q5U4D9  | Thoc6     | Tho Complex 6 Homolog                                      | 6.67  | 37.31    |
| IP000987700 | Q8VDS0  | Pds5A     | Pds5, Regulator Of Cohesion Maintenance, Homolog A         | 7.85  | 65.80    |
| IP00129535  | Q9Z0W3  | Nup160    | Nucleoporin 160                                            | 5.32  | 158.23   |
| IP00453851  | Q8C9B9  | Dldo1     | Death Inducer-Obliterator 1                                | 8.11  | 247.18   |
| IP00464141  | Q6PFD9  | Nup98     | Nucleoporin 98                                             | 5.98  | 124.81   |
| IP00222307  | Q8BJ71  | Nup93     | Similar To Nucleoporin 93                                  | 5.50  | 93.28    |
| IP00457815  | Q3TIX9  | Usp39     | Ubiquitin Specific Peptidase 39                            | 9.01  | 65.15    |
| IP000751568 | Q497V5  | Srbd1     | S1 Rna Binding Domain 1                                    | 9.01  | 114.09   |
| IP000309733 | Q8BGW5  | Olfbc2A   | Oligonucleotide/Oligosaccharide-Binding Fold Containing 2A | 9.45  | 21.75    |
| IP00132415  | Q9D0D4  | Dimt1     | Dim1 Dimethyladenosine Transferase 1-Like                  | 10.01 | 35.27    |
| IP00463468  | Q6DFW4  | Nop58     | Nop58 Ribonucleoprotein Homolog                            | 8.53  | 60.34    |
| IP00124057  | Q8C4J7  | Tbi3      | Transducin (Beta)-Like 3                                   | 6.34  | 88.27    |
| IP00119727  | Q8C2N1  | Q8C2N1    | Putative Uncharacterized Protein                           | 11.10 | 24.84    |
| IP00122318  | Q921W0  | Chmp1A    | Chromatin Modifying Protein 1A                             | 7.77  | 21.61    |
| IP00229025  | Q8CEC6  | Ppvd1     | Peptidylprolyl Isomerase Domain And Wd Repeat Containing 1 | 6.73  | 73.25    |
| IP00119442  | Q9JHI7  | Exosc9    | Exosome Component 9                                        | 5.03  | 48.94    |
| IP00127174  | Q3UEB3  | Fuf60     | Poly-U Binding Splicing Factor 60                          | 5.20  | 60.25    |
| IP00459381  | Q8K363  | Ddx18     | Predicted Gene 16433                                       | 9.54  | 74.18    |
| IP00224351  | Q8BRG8  | Tmem209   | Transmembrane Protein 209                                  | 8.89  | 62.98    |
| IP00153371  | Q8R1F9  | Rpp40     | Ribonuclease P 40 Subunit                                  | 6.21  | 41.55    |
| IP00113134  | Q9CZU3  | Skiv2L2   | Superkiller Viralicidal Activity 2-Like 2                  | 6.02  | 117.51   |
| IP00123870  | Q9CU62  | Smc1A     | Structural Maintenance Of Chromosomes 1A                   | 7.51  | 143.23   |
| IP00463666  | Q9R0Q4  | Morf4L2   | Mortality Factor 4 Like 2                                  | 9.72  | 32.18    |
| IP000972898 | Q32M04  | Prps1     | Mirror-Image Polydactyly Gene 1 Homolog                    | 6.19  | 35.09    |
| IP00137848  | Q9D564  | Sf3A3     | Splicing Factor 3A, Subunit 3                              | 5.23  | 58.84    |
| IP000311873 | P62141  | Ppp1Cb    | Protein Phosphatase 1, Catalytic Subunit, Beta Isoform     | 5.85  | 37.06    |
| IP000875090 | E9QL0E  | Ifi204    | Interferon-Activable Protein 204                           | 9.05  | 71.69    |
| IP00116442  | Q3UMU9  | Hdgfrp2   | Hepatoma-Derived Growth Factor, Related Protein 2          | 8.72  | 74.29    |
| IP00121562  | Q9JJA4  | Wdr12     | Wd Repeat Domain 12                                        | 5.36  | 47.22    |
| IP000331601 | Q8R2N2  | Cirrh1A   | Cirrhosis, Autosomal Recessive 1A                          | 9.06  | 76.91    |
| IP00135252  | Q8CDM1  | Atad2     | Atpase Family, Aaa Domain Containing 2                     | 6.46  | 117.94   |
| IP00121758  | Q921F2  | Tardbp    | Tar Dna Binding Protein                                    | 6.26  | 44.55    |
| IP00116747  | Q99LC2  | Cstf1     | Cleavage Stimulation Factor, 3' Pre-Rna, Subunit 1         | 6.12  | 48.38    |
| IP00402911  | Q810V0  | Mphosph10 | M-Phase Phosphoprotein 10                                  | 4.78  | 78.73    |
| IP00410792  | Q8K2F0  | Brd3      | Bromodomain Containing 3                                   | 9.38  | 79.76    |
| IP000331424 | Q8CCF0  | Prpf31    | Prp31 Pre-Mrna Processing Factor 31 Homolog                | 5.55  | 55.43    |
| IP000915480 | Q4FZH3  | Sap18     | Similar To Sap18                                           | 9.38  | 17.60    |
| IP000330958 | Q60668  | Hnmpd     | Heterogeneous Nuclear Ribonucleoprotein D                  | 7.61  | 38.35    |
| IP000894870 | Q1HFZ0  | Nsun2     | Nol1/Nop2/Sun Domain Family Member 2                       | 6.16  | 85.45    |
| IP00128615  | Q8VHR5  | Gatad2B   | Gata Zinc Finger Domain Containing 2B                      | 9.73  | 65.41    |
| IP00263042  | Q6ZWM4  | Naa38     | Lsm8 Homolog, U6 Small Nuclear Rna Associated              | 4.34  | 10.27    |
| IP00221767  | Q8BH74  | Nup107    | Nucleoporin 107                                            | 5.26  | 106.72   |
| IP00124272  | P97386  | Lig3      | Ligase Iii, Dna, Atp-Dependent                             | 9.16  | 113.07   |
| IP00404707  | Q8C2Q3  | Rbm14     | Rna Binding Motif Protein 14                               | 9.68  | 69.45    |
| IP00125325  | Q9WV68  | Decr2     | 2-4-Dienoyl-Coenzyme A Reductase 2                         | 9.04  | 31.30    |
| IP00459787  | Q8VCD5  | Med17     | Mediator Complex Subunit 17                                | 6.86  | 72.46    |
| IP000938530 | E9QPE7  | Myh11     | Myosin-11                                                  | 5.42  | 223.36   |
| IP000330263 | Q8CFO3  | Aqr       | Aquarius                                                   | 5.87  | 170.29   |
| IP00169700  | Q76KJ5  | Cd3Eap    | Cd3E Antigen, Epsilon Polypeptide Associated Protein       | 9.63  | 43.08    |
| IP00653643  | Q3UMT7  | HnmpL     | Heterogeneous Nuclear Ribonucleoprotein L                  | 7.27  | 64.08    |
| IP000318548 | Q9D883  | U2A1f     | U2 Small Nuclear Ribonucleoprotein Auxillary Factor 1      | 9.10  | 27.68    |
| IP00225192  | Q8BT54  | Nup54     | Nucleoporin 54                                             | 6.53  | 55.73    |
| IP00221822  | Q8BHB4  | Wdr3      | Wd Repeat Domain 3                                         | 6.20  | 105.78   |
| IP00119892  | O54941  | Smarce1   | Brg1-Associated Factor 57                                  | 4.84  | 46.64    |
| IP000331172 | Q922V4  | Plrg1     | Pleiotropic Regulator 1, Prl1 Homolog                      | 9.25  | 56.94    |
| IP000551412 | P61327  | Magoh     | Mago-Nashi Homolog, Proliferation-Associated               | 5.74  | 17.16    |
| IP000918121 | O88559  | Men1      | Multiple Endocrine Neoplasia 1                             | 5.99  | 67.50    |
| IP000876121 | Q3TAQ9  | Wdr36     | Wd Repeat Domain 36                                        | 6.64  | 99.72    |
| IP00462502  | A2BE28  | Las1L     | Las1-Like                                                  | 4.37  | 89.41    |
| IP00123881  | P97311  | Mcm6      | Minichromosome Maintenance Deficient 6                     | 5.31  | 92.87    |
| IP00321912  | Q8K202  | Pcm1E     | Polymerase (Rna) I Polypeptide E                           | 8.43  | 54.03    |
| IP00380355  | Q8BTZ4  | Anapc5    | Anaphase-Promoting Complex Subunit 5                       | 6.24  | 83.10    |
| IP00480507  | Q99KP6  | Prpf19    | Prp19/Pso4 Pre-Mrna Processing Factor 19 Homolog           | 6.14  | 55.11    |
| IP000320399 | Q61029  | Tmpo      | Thymopoietin                                               | 9.46  | 50.24    |
| IP00458057  | Q3URQ0  | Tex10     | Testis Expressed Gene 10                                   | 9.26  | 105.21   |
| IP00420597  | Q65Z40  | Wapal     | Wings Apart-Like Homolog                                   | 5.26  | 134.07   |
| IP00129184  | Q91X11  | Dus3L     | Dihydrouridine Synthase 3-Like                             | 8.34  | 70.95    |
| IP00620167  | Q9EQ61  | Pes1      | Pescadillo Homolog 1                                       | 6.41  | 67.80    |
| IP00135646  | P55096  | Abcd3     | Atp-Binding Cassette, Sub-Family D, Member 3               | 9.32  | 75.47    |
| IP00119227  | P63280  | Ube2l     | Ubiquitin-Conjugating Enzyme E2l                           | 8.87  | 18.01    |
| IP000317701 | Q9CZ04  | Cops7A    | Constitutive Photomorphogenic Homolog, Subunit 7A          | 7.67  | 30.09    |
| IP00625464  | Q3TZX8  | Nol9      | Nucleolar Protein 9                                        | 9.54  | 80.71    |
| IP01023317  | Q8QZV7  | Asun      | Protein Asunder Homolog                                    | 6.46  | 82.78    |
| IP00759925  | Q9ERGO  | Lima1     | Lim Domain And Actin Binding 1                             | 6.18  | 84.06    |
| IP00828490  | Q61191  | Hcfc1     | Similar To Transcription Factor C1                         | 4.67  | 63.47    |
| IP00462762  | Q640M1  | Utp14A    | Utp14, U3 Small Nucleolar Ribonucleoprotein, Homolog A     | 9.22  | 87.27    |
| IP00117288  | Q99020  | Hnmpab    | Heterogeneous Nuclear Ribonucleoprotein A/B                | 7.69  | 30.83    |
| IP000938465 | Q6ZQL4  | Wdr43     | Wd Repeat Domain 43                                        | 5.22  | 75.38    |
| IP00672180  | Q9Z103  | Adnp      | Activity-Dependent Neuroprotective Protein                 | 5.70  | 92.06    |
| IP00153664  | Q8R2U4  | Mettl11A  | Methyltransferase Like 11A                                 | 6.42  | 25.29    |
| IP00874482  | P63260  | Actg1     | Actin, Gamma, Cytoplasmic 1                                | 5.31  | 41.79    |
| IP00120145  | Q9DC48  | Cdc40     | Cell Division Cycle 40 Homolog                             | 6.62  | 65.46    |
| IP00116031  | Q99KG3  | Rbm10     | Rna Binding Motif Protein 10                               | 5.66  | 103.49   |
| IP00129222  | Q03147  | Cdk7      | Cyclin-Dependent Kinase 7                                  | 8.66  | 38.97    |
| IP000323748 | P54116  | Stom      | Stomatin                                                   | 6.46  | 31.38    |
| IP000858099 | Q09XV5  | Chd8      | Chromodomain Helicase Dna Binding Protein 8                | 6.00  | 290.85   |
| IP00410836  | Q3TGH6  | Fen1      | Flap Structure Specific Endonuclease 1                     | 8.68  | 42.56    |
| IP00828488  | O88569  | Hnmpa2B1  | Heterogeneous Nuclear Ribonucleoprotein A2/B1              | 8.97  | 37.40    |

| Protein ID  | Uniprot | Symbol   | Protein name                                                      | pI    | Mw (kDa) |
|-------------|---------|----------|-------------------------------------------------------------------|-------|----------|
| IP100221690 | Q8BGS0  | Mak16    | Mak16 Homolog                                                     | 5.24  | 35.19    |
| IP100719915 | Q9CW46  | Raver1   | Ribonucleoprotein, Ptb-Binding 1                                  | 8.91  | 79.25    |
| IP100124938 | Q9WUP7  | Uchl5    | Ubiquitin Carboxyl-Terminal Esterase L5                           | 5.24  | 37.62    |
| IP100128183 | Q9R0X0  | Med20    | Mediator Of Rna Polymerase II Transcription Subunit 20            | 6.42  | 23.19    |
| IP100132093 | Q9QUR7  | Pin1     | Protein (Peptidyl-Prolyl Cis/Trans Isomerase) Nima-Interacting 1  | 8.93  | 18.37    |
| IP100112763 | Q9CZJ1  | Utp11L   | Utp11-Like, U3 Small Nucleolar Ribonucleoprotein                  | 10.26 | 30.55    |
| IP100230429 | O35344  | Kpna3    | Karyopherin Alpha 3                                               | 4.80  | 57.64    |
| IP100311968 | P97376  | Frg1     | Fshd Region Gene 1                                                | 9.03  | 29.13    |
| IP100311534 | Q8VDG3  | Pam      | Poly(A)-Specific Ribonuclease                                     | 5.68  | 71.56    |
| IP100331597 | P43277  | Hist1H1D | Histone Cluster 1, H1D                                            | 11.03 | 21.97    |
| IP100109696 | Q9CWW6  | Pin4     | Protein (Peptidyl-Prolyl Cis/Trans Isomerase) Nima-Interacting, 4 | 9.78  | 13.81    |
| IP100135099 | Q9QXK7  | Cpsf3    | Cleavage And Polyadenylation Specificity Factor 3                 | 5.37  | 77.50    |
| IP100625105 | Q62376  | Snmp70   | Small Nuclear Ribonucleoprotein 70                                | 9.94  | 51.99    |
| IP100458056 | Q3UYV9  | Ncbp1    | Expressed Sequence Au014645                                       | 6.17  | 91.93    |
| IP100169888 | Q8K2D3  | Edc3     | Enhancer Of Mrna Decapping 3 Homolog                              | 6.63  | 55.96    |
| IP100467338 | P46061  | Rangap1  | Ran Gtpase Activating Protein 1                                   | 4.59  | 63.40    |
| IP100420602 | Q6ZQH8  | Nup188   | Nucleoporin 188                                                   | 6.57  | 196.56   |
| IP100877286 | Q9CY46  | Lsm4     | Lsm4 Homolog, U6 Small Nuclear Rna Associated                     | 10.08 | 15.20    |
| IP100169460 | Q99K95  | Ct043    | Upt0549 Protein C20Orf43 Homolog                                  | 9.05  | 33.93    |
| IP100112769 | P70700  | Poli1B   | Polymerase (Rna) I Polypeptide B                                  | 7.65  | 128.21   |
| IP100338887 | Q9R1C7  | Prp40A   | Prp40 Pre-Mrna Processing Factor 40 Homolog A                     | 7.39  | 108.48   |
| IP100132376 | P63154  | Crnk1    | Crm, Crooked Neck-Like 1                                          | 6.53  | 83.42    |
| IP100125510 | Q9JMD0  | Zfp207   | Zinc Finger Protein 207                                           | 9.20  | 52.79    |
| IP100117016 | P49717  | Mcm4     | Minichromosome Maintenance Deficient 4 Homolog                    | 6.77  | 96.74    |
| IP100130185 | P62137  | Ppp1Ca   | Protein Phosphatase 1, Catalytic Subunit, Alpha Isoform           | 5.94  | 37.41    |
| IP100128268 | Q91WN1  | Dnajc9   | Dnaj Homolog, Subfamily C, Member 9                               | 5.76  | 30.06    |
| IP100120691 | Q9JJK5  | Ddx21    | Dead (Asp-Glu-Ala-Asp) Box Polypeptide 21                         | 9.19  | 93.55    |
| IP100133562 | Q9CR89  | Chchd3   | Coiled-Coil-Helix-Coiled-Coil-Helix Domain Containing 3           | 8.57  | 26.20    |
| IP100133491 | P83870  | Phf5A    | Phd Finger Protein 5A                                             | 8.78  | 12.41    |
| IP100626752 | Q9WVA3  | Bub3     | Budding Uninhibited By Benzimidazoles 3 Homolog                   | 6.37  | 36.95    |
| IP100172197 | Q8K298  | Anln     | Anillin                                                           | 6.59  | 122.79   |
| IP100113746 | P26369  | U2AF2    | U2 Small Nuclear Ribonucleoprotein Auxiliary Factor 2             | 9.19  | 53.39    |
| IP100120344 | Q920B9  | Supt16H  | Suppressor Of Ty 16 Homolog                                       | 5.50  | 119.69   |
| IP100848672 | Q3UIX4  | Sfrs11   | Splicing Factor, Arginine/Serine-Rich 11                          | 10.58 | 53.10    |
| IP100330763 | Q80XP8  | Fam76B   | Family With Sequence Similarity 76, Member B                      | 9.42  | 38.42    |
| IP100120744 | Q9DCC2  | Xab2     | Xpa Binding Protein 2                                             | 5.87  | 99.99    |
| IP100108271 | P70372  | Elavl1   | Embryonic Lethal, Abnormal Vision -Like 1                         | 9.12  | 36.17    |
| IP100323357 | P63017  | Hspa8    | Heat Shock Protein 8                                              | 5.37  | 70.74    |
| IP100974806 | Q6PDM2  | Sfrs1    | Splicing Factor, Arginine/Serine-Rich 1                           | 10.37 | 27.61    |
| IP100317794 | P09405  | Ncl      | Nucleolin                                                         | 4.68  | 76.59    |
| IP100402914 | Q9JH89  | Ccdc86   | Coiled-Coil Domain Containing 86                                  | 9.67  | 46.49    |
| IP100112963 | P26231  | Cttna1   | Catenin, Alpha 1                                                  | 5.91  | 99.98    |
| IP100121073 | P60824  | Cirbp    | Cold Inducible Rna Binding Protein                                | 9.61  | 18.61    |
| IP100272622 | Q8BP48  | Metap1   | Methionyl Aminopeptidase 1                                        | 6.80  | 43.09    |
| IP100226891 | Q8C854  | Myef2    | Myelin Basic Protein Expression Factor 2, Repressor               | 8.96  | 63.16    |
| IP100139259 | P62996  | Tra2B    | Transformer 2 Beta Homolog                                        | 11.25 | 33.67    |
| IP100121623 | P63168  | Dynl1    | Similar To Cytoplasmic Dynein Light Chain 1                       | 6.89  | 10.37    |
| IP100265217 | Q8CFE3  | Rcor1    | Rest Corepressor 1                                                | 6.56  | 52.50    |
| IP100222763 | Q8BL97  | Sfrs7    | Splicing Factor, Arginine/Serine-Rich 7                           | 11.89 | 30.82    |
| IP100314467 | Q9R1P1  | Psmb3    | Proteasome Subunit, Beta Type 3                                   | 6.13  | 22.83    |
| IP100130409 | Q91YR7  | Prpf6    | Prp6 Pre-Mrna Splicing Factor 6 Homolog                           | 8.31  | 106.72   |
| IP100226466 | Q5U458  | Dnajc11  | Dnaj Homolog, Subfamily C, Member 11                              | 8.51  | 63.23    |
| IP100114953 | Q9J995  | Cdk9     | Cyclin-Dependent Kinase 9                                         | 8.97  | 42.76    |
| IP100314302 | O35218  | Cpsf2    | Cleavage And Polyadenylation Specific Factor 2                    | 4.98  | 88.38    |
| IP100750671 | P62627  | Dynlrb1  | Dynein Light Chain Roadblock-Type 1                               | 6.84  | 10.86    |
| IP100469755 | Q8BU03  | Pwp2     | Pwp2 Periodic Tryptophan Protein Homolog                          | 5.83  | 102.91   |
| IP100553777 | P49312  | Hnmpa1   | Heterogeneous Nuclear Ribonucleoprotein A1-Like 2                 | 9.27  | 34.07    |
| IP100134747 | Q9D2E2  | Toe1     | Target Of Egr1, Member 1                                          | 6.20  | 56.74    |
| IP100223422 | Q8K114  | Ints9    | Integrator Complex Subunit 9                                      | 5.97  | 74.08    |
| IP100221621 | Q8R349  | Cdc16    | Cdc16 Cell Division Cycle 16 Homolog                              | 5.48  | 71.46    |
| IP100313817 | P51859  | Hdgf     | Hepatoma-Derived Growth Factor                                    | 4.80  | 26.27    |
| IP100469260 | O08810  | Eftud2   | Elongation Factor Tu Gtp Binding Domain Containing 2              | 4.86  | 109.36   |
| IP100853911 | Q8K4B0  | Mta1     | Metastasis-Associated Protein                                     | 9.37  | 80.80    |
| IP100115588 | Q99JX7  | Nxf1     | Nuclear Rna Export Factor 1 Homolog                               | 8.93  | 70.17    |
| IP100126716 | Q91VC3  | Eif4A3   | Eukaryotic Translation Initiation Factor 4A, Isoform 3            | 6.33  | 46.71    |
| IP100849838 | Q9WTK2  | Cdyl     | Chromodomain Protein, Y Chromosome-Like                           | 8.85  | 65.21    |
| IP100170345 | Q8JZM7  | Cdc73    | Parafibromin                                                      | 9.63  | 60.45    |
| IP100228272 | Q9CXV9  | Dcn1D5   | Dcn1, Defective In Cullin Neddylation 1, Domain Containing 5      | 5.33  | 27.58    |
| IP100353010 | Q8R3N1  | Nop14    | Nop14 Nucleolar Protein Homolog                                   | 7.34  | 98.77    |
| IP100987239 | Q08EC1  | Wdr75    | Wd Repeat Domain 75                                               | 5.78  | 93.92    |
| IP100230388 | P62311  | Lsm3     | Lsm3 Homolog, U6 Small Nuclear Rna Associated                     | 4.58  | 11.71    |
| IP100229397 | Q8CG47  | Smc4     | Structural Maintenance Of Chromosomes 4                           | 6.91  | 146.89   |
| IP100135420 | Q9QY15  | Ddx25    | Dead (Asp-Glu-Ala-Asp) Box Polypeptide 25                         | 5.71  | 54.88    |
| IP100109588 | P02463  | Col4A1   | Collagen, Type Iv, Alpha 1                                        | 8.39  | 144.02   |
| IP100421119 | Q8BU35  | Rbm25    | Rna Binding Motif Protein 25                                      | 4.86  | 36.19    |
| IP100311904 | Q8VE80  | Thoc3    | Tho Complex 3                                                     | 5.70  | 38.61    |
| IP100119632 | Q9DBE9  | Ftsj3    | Ftsj Homolog 3                                                    | 8.51  | 95.53    |
| IP100408796 | Q8K4Z5  | SfsA1    | Splicing Factor 3A, Subunit 1                                     | 5.15  | 88.54    |
| IP100119478 | Q9JHJ0  | Tmod3    | Tropomodulin 3                                                    | 5.02  | 39.50    |
| IP100123651 | Q61655  | Ddx19A   | Dead (Asp-Glu-Ala-Asp) Box Polypeptide 19A                        | 6.28  | 53.80    |
| IP100785240 | Q8BT18  | Srrm2    | Serine/Arginine Repetitive Matrix 2                               | 12.02 | 294.84   |
| IP100470152 | P62983  | Rps27A   | Ubiquitin-40S Ribosomal Protein S27A                              | 6.56  | 8.56     |
| IP100120257 | Q99P31  | Hspbp1   | Hspa Binding Protein, Cytoplasmic Cochaperone 1                   | 5.26  | 39.17    |
| IP100378469 | Q08619  | Mnda     | Myeloid Cell Nuclear Differentiation Antigen                      | 8.20  | 46.98    |
| IP100263028 | Q8BI72  | Cdkn2Aip | Cdkn2A Interacting Protein                                        | 9.27  | 59.61    |
| IP100153653 | Q8R332  | Nup1     | Nucleoporin Like 1                                                | 9.31  | 59.45    |
| IP100762287 | Q8K335  | Grwd1    | Glutamate-Rich Wd Repeat Containing 1                             | 4.70  | 37.91    |
| IP100110725 | Q9CY28  | Gtpbp8   | Gtp-Binding Protein 8                                             | 9.34  | 31.87    |
| IP100856427 | Q80X82  | Sympk    | Symplekin                                                         | 5.77  | 142.15   |
| IP100331170 | Q922U1  | Prpf3    | Prp3 Pre-Mrna Processing Factor 3 Homolog                         | 9.50  | 77.45    |
| IP100467084 | Q9CWS4  | Cpsf3L   | Cleavage And Polyadenylation Specific Factor 3-Like               | 8.11  | 67.84    |
| IP100876050 | O35900  | Lsm2     | Lsm2 Homolog, U6 Small Nuclear Rna Associated                     | 6.05  | 10.83    |
| IP100135921 | Q9D3E6  | Stag1    | Stromal Antigen 1                                                 | 5.40  | 144.44   |
| IP100553784 | Q6P8I4  | Pcnp     | Pest Proteolytic Signal Containing Nuclear Protein                | 6.86  | 18.96    |
| IP100118139 | Q60596  | Xrcc1    | Dna Repair Protein Xrcc1                                          | 5.97  | 68.97    |
| IP100133920 | Q9D1M0  | Sec13    | Sec13 Homolog                                                     | 5.15  | 35.43    |
| IP100111981 | Q9CZ30  | Ola1     | Obg-Like Atpase 1                                                 | 7.64  | 44.73    |



| Protein ID  | Uniprot | Symbol  | Protein name                                               | pI    | Mw (kDa) |
|-------------|---------|---------|------------------------------------------------------------|-------|----------|
| IP100474883 | Q3TVK4  | Capzb   | Capping Protein Muscle Z-Line, Beta                        | 5.56  | 30.62    |
| IP100313726 | O35134  | Polr1A  | Polymerase (Rna) I Polypeptide A                           | 6.50  | 194.11   |
| IP100881462 | Q9D824  | Fip1L1  | Fip1 Like 1                                                | 5.54  | 64.96    |
| IP100134300 | P32067  | Ssb     | Sjogren Syndrome Antigen B                                 | 9.77  | 47.76    |
| IP100331361 | Q7TPV4  | Mybbp1A | Myb Binding Protein 1A                                     | 9.08  | 152.04   |
| IP100226073 | Q922X1  | Hnmpf   | Heterogeneous Nuclear Ribonucleoprotein F                  | 5.30  | 45.73    |
| IP100462979 | Q91Z49  | Fytd1   | Forty-Two-Three Domain Containing 1                        | 11.83 | 35.89    |
| IP100649329 | O35345  | Kpna6   | Karyopherin Alpha 6                                        | 4.86  | 59.96    |
| IP100221908 | Q8BHN5  | Rbm45   | Similar To Developmentally Regulated Rna-Binding Protein 1 | 7.57  | 53.32    |
| IP100229721 | Q8BG81  | Foldip3 | Polymerase, Delta Interacting Protein 3                    | 10.06 | 46.00    |
| IP100114407 | O08583  | Thoc4   | Tho Complex 4                                              | 11.15 | 26.81    |
| IP100323674 | Q9Z315  | Sart1   | Squamous Cell Carcinoma Antigen Recognized By T-Cells 1    | 5.66  | 90.89    |
| IP100123878 | Q8VDW0  | Ddx39   | Dead (Asp-Glu-Ala-Asp) Box Polypeptide 39                  | 5.46  | 48.94    |
| IP100554845 | Q8CAQ8  | Immt    | Inner Membrane Protein, Mitochondrial                      | 6.18  | 83.90    |
| IP100320016 | Q99K48  | Nono    | Non-Pou-Domain-Containing, Octamer Binding Protein         | 9.01  | 54.54    |
| IP100130591 | Q9Z1X4  | Ilf3    | Interleukin Enhancer Binding Factor 3                      | 8.86  | 96.02    |
| IP100323881 | P70168  | Kpnb1   | Karyopherin Beta 1                                         | 4.68  | 97.18    |
| IP100116929 | Q99L17  | Cstf3   | Cleavage Stimulation Factor, 3' Pre-Rna, Subunit 3         | 8.26  | 82.88    |
| IP100121788 | P35700  | Prdx1   | Peroxiredoxin 1                                            | 8.26  | 22.18    |
| IP100133440 | P67778  | Phb     | Prohibitin                                                 | 5.57  | 29.82    |
| IP100129323 | P84104  | Sfrs3   | Splicing Factor, Arginine/Serine-Rich 3                    | 11.64 | 19.33    |
| IP100127763 | Q8VH51  | Rbm39   | Rna Binding Motif Protein 39                               | 10.10 | 59.28    |
| IP100828892 | Q5SFM8  | Rbm27   | Rna Binding Motif Protein 27                               | 9.24  | 118.55   |
| IP100475378 | Q3U512  | Ptbp1   | Polypyrimidine Tract Binding Protein 1                     | 9.22  | 59.28    |
| IP100331163 | Q9VWX5  | Skp1A   | S-Phase Kinase-Associated Protein 1A                       | 4.40  | 18.54    |
| IP100989934 | E9PWB2  | Csnk1A1 | Casein Kinase I Isoform Alpha?                             | 9.49  | 43.40    |
| IP101008455 | E9QPT2  | Ncapd2  | Condensin Complex Subunit 1?                               | 5.80  | 156.81   |
| IP100124240 | P97377  | Cdk2    | Cyclin-Dependent Kinase 2                                  | 8.79  | 38.98    |
| IP100137668 | P70288  | Hdac2   | Histone Deacetylase 2                                      | 5.59  | 55.30    |
| IP100153778 | Q8R3N6  | Thoc1   | Tho Complex 1                                              | 4.89  | 75.44    |
| IP100132208 | P63037  | Dnaja1  | Dnaj (Hsp40) Homolog, Subfamily A, Member 1                | 6.85  | 44.55    |
| IP101023287 | Q3UXW3  | Ddx5    | Dead (Asp-Glu-Ala-Asp) Box Polypeptide 5                   | 9.06  | 69.23    |
| IP100330862 | P26040  | Ezr     | Ezrin                                                      | 5.83  | 69.28    |
| IP101007734 | Q6A4J8  | Usp7    | Ubiquitin Specific Peptidase 7                             | 5.29  | 128.48   |
| IP100395213 | P28659  | Celf1   | Cug Triplet Repeat, Rna Binding Protein 1                  | 8.70  | 52.11    |
| IP100117063 | P56959  | Fus     | RNA-binding protein FUS                                    | 9.40  | 52.67    |
| IP100222461 | Q8C111  | Gni3    | Guanine Nucleotide Binding Protein-Like 3                  | 9.21  | 60.79    |
| IP100420745 | P49722  | PsmA2   | Proteasome Subunit, Alpha Type 2                           | 8.42  | 25.79    |
| IP100663587 | Q91VM5  | Rbmxt   | Rna Binding Motif Protein, X Chromosome Retrogene          | 10.00 | 42.16    |
| IP100454118 | Q9JLV6  | Pnkp    | Polynucleotide Kinase 3'-Phosphatase                       | 8.03  | 57.22    |
| IP100421162 | Q6NZF1  | Zc3H11A | Zinc Finger Cch Type Containing 11A                        | 8.39  | 86.49    |
| IP100340529 | Q3TMP1  | Gtf3C3  | General Transcription Factor Iic, Polypeptide 3            | 5.04  | 100.62   |
| IP100890268 | Q99104  | Myo5A   | Myosin Va                                                  | 8.82  | 215.54   |
| IP100122743 | Q9Z2B2  | Dars    | Aspartyl-Trna Synthetase                                   | 6.06  | 57.15    |
| IP100113686 | Q9ESZ8  | Gtf2l   | General Transcription Factor II                            | 6.22  | 112.13   |
| IP100342382 | P56960  | Exosc10 | Exosome Component 10                                       | 8.51  | 100.94   |
| IP100330066 | Q3UJB9  | Edc4    | Enhancer Of Mrna Decapping 4                               | 5.51  | 152.35   |
| IP100124052 | Q9VWX8  | Mad1L1  | Mitotic Arrest Deficient 1-Like 1                          | 5.52  | 83.54    |
| IP100110456 | Q9CXL3  | Cg050   | Uncharacterized Protein C7Orf50 Homolog                    | 9.49  | 22.27    |
| IP100399961 | O35841  | Apl5    | Apoptosis Inhibitor 5                                      | 5.72  | 56.65    |
| IP100128818 | O35286  | Dhx15   | Deah (Asp-Glu-Ala-His) Box Polypeptide 15                  | 7.12  | 91.01    |
| IP100828361 | Q6NZN0  | Rbm26   | Rna Binding Motif Protein 26                               | 9.21  | 114.14   |
| IP100119959 | O54962  | Banf1   | Barrier To Autointegration Factor 1                        | 5.79  | 10.10    |
| IP100227657 | Q9ESP1  | Sdf2L1  | Stromal Cell-Derived Factor 2-Like 1                       | 6.37  | 20.90    |
| IP100221793 | Q8BGZ4  | Cdc23   | Cell Division Cycle 23                                     | 6.77  | 68.56    |
| IP100752710 | P53569  | Cebpz   | Ccaat/Enhancer Binding Protein Zeta                        | 5.53  | 120.26   |
| IP100108143 | P70333  | HnmpH2  | Heterogeneous Nuclear Ribonucleoprotein H2                 | 5.89  | 49.28    |
| IP100132957 | Q9D0R4  | Ddx56   | Dead (Asp-Glu-Ala-Asp) Box Polypeptide 56                  | 9.26  | 61.21    |
| IP100284444 | Q6A068  | Cdc5L   | Predicted Gene 9040                                        | 7.98  | 92.19    |
| IP100127987 | Q9R0Q6  | Arpc1A  | Actin Related Protein 2/3 Complex, Subunit 1A              | 8.46  | 41.63    |
| IP100139994 | Q63850  | Nup62   | Nucleoporin 62                                             | 5.19  | 53.25    |
| IP100127071 | Q91VN6  | Ddx41   | Dead (Asp-Glu-Ala-Asp) Box Polypeptide 41                  | 6.27  | 69.82    |
| IP100115862 | O55135  | Eif6    | Eukaryotic Translation Initiation Factor 6                 | 4.63  | 26.51    |
| IP100135087 | O35864  | Cops5   | Cop9 Homolog, Subunit 5                                    | 6.11  | 37.42    |
| IP100114593 | P68033  | Actc1   | Actin, Alpha, Cardiac Muscle 1                             | 5.23  | 41.78    |
| IP100134746 | P16460  | Ass1    | Argininosuccinate Synthetase 1                             | 8.36  | 46.58    |
| IP100230649 | O08573  | Leg9    | Lectin, Galactose Binding, Soluble 9                       | 9.41  | 40.04    |
| IP100349401 | Q3UAU4  | Sf3B2   | Splicing Factor 3B, Subunit 2                              | 5.47  | 98.19    |
| IP100987797 | Q8VEM8  | Sic25A3 | Solute Carrier Family 25, Member 3                         | 9.11  | 34.84    |
| IP100331556 | Q61316  | Hspa4   | Heat Shock Protein 4                                       | 5.15  | 94.13    |
| IP100221523 | Q8BFY9  | Tnpo1   | Predicted Gene 6493                                        | 4.84  | 102.36   |
| IP100421196 | Q3TLT4  | Ddx31   | Dead/H (Asp-Glu-Ala-Asp/His) Box Polypeptide 31            | 9.78  | 76.93    |
| IP100653307 | Q3U741  | Ddx17   | Dead (Asp-Glu-Ala-Asp) Box Polypeptide 17                  | 8.88  | 72.58    |
| IP100380281 | Q7TN25  | Sf3A2   | Splicing Factor 3A, Subunit 2                              | 9.65  | 51.31    |
| IP100121887 | P10711  | Tcea1   | Transcription Elongation Factor A 1                        | 8.65  | 33.88    |
| IP100331174 | P80313  | Cct7    | Chaperonin Containing Tcp1, Subunit 7 (Eta)                | 7.95  | 59.65    |
| IP100113845 | O09061  | Psmb1   | Proteasome Subunit, Beta Type 1                            | 8.32  | 23.55    |
| IP100266463 | Q99MR6  | Srrt    | Serrate Rna Effector Molecule Homolog                      | 5.71  | 100.45   |
| IP100129512 | P99026  | Psmb4   | Proteasome Subunit, Beta Type 4                            | 5.43  | 24.36    |
| IP100131810 | O88532  | Zfr     | Zinc Finger Rna Binding Protein                            | 9.17  | 116.86   |
| IP100314984 | Q3LUX8  | Sfrs13A | Predicted Gene 5446                                        | 11.22 | 31.23    |
| IP100131845 | Q9QUM9  | PsmA6   | Proteasome Subunit, Alpha Type 6                           | 6.34  | 27.37    |
| IP100409462 | Q9Z1N5  | Bat1A   | Hla-B-Associated Transcript 1A                             | 5.44  | 48.90    |
| IP100453826 | Q8K310  | Matr3   | Matrin 3                                                   | 5.87  | 94.50    |
| IP100222687 | Q8BKT7  | Thoc5   | Tho Complex 5                                              | 6.68  | 78.69    |
| IP100109764 | Q04750  | Top1    | Topoisomerase (Dna) I                                      | 9.35  | 90.74    |
| IP100116284 | Q64213  | Sf1     | Splicing Factor 1                                          | 9.14  | 70.27    |
| IP100128904 | P60335  | Pcbp1   | Poly(Rc) Binding Protein 1                                 | 6.66  | 37.50    |
| IP100331654 | Q8K2T8  | Paf1    | Paf1, Rna Polymerase II Associated Factor, Homolog         | 4.55  | 60.52    |
| IP100131406 | Q9Z2U0  | PsmA7   | Proteasome Subunit, Alpha Type 7                           | 8.59  | 27.72    |
| IP100465574 | Q3U6X2  | Hnmpk   | Heterogeneous Nuclear Ribonucleoprotein K                  | 5.70  | 51.06    |
| IP100310880 | Q3TWW8  | Sfrs6   | Splicing Factor, Arginine/Serine-Rich 6                    | 11.46 | 39.03    |
| IP100122202 | B2RQA7  | Ncapg   | Non-Smc Condensin I Complex, Subunit G                     | 5.55  | 73.80    |
| IP100135207 | Q8CH18  | Ccar1   | Cell Division Cycle And Apoptosis Regulator 1              | 5.57  | 132.06   |
| IP100122011 | Q9Z1M3  | Sf3B3   | Splicing Factor 3B, Subunit 3                              | 5.13  | 135.55   |
| IP100785231 | Q3TUQ5  | Pnn     | Pinin                                                      | 6.58  | 82.50    |
| IP100131871 | O88544  | Cops4   | Cop9 Homolog, Subunit 4                                    | 5.57  | 46.15    |

| Protein ID  | Uniprot | Symbol   | Protein name                                                    | pI    | Mw (kDa) |
|-------------|---------|----------|-----------------------------------------------------------------|-------|----------|
| IP100400168 | Q7TPW1  | Nexn     | Nexlin                                                          | 4.98  | 72.11    |
| IP100627045 | Q6ZQK0  | Ncapd3   | Non-Smc Condensin II Complex, Subunit D3                        | 6.74  | 169.43   |
| IP100132340 | Q9D0B0  | Sfrs9    | Splicing Factor, Arginine/Serine Rich 9                         | 8.74  | 25.66    |
| IP100108085 | P70318  | Tial1    | Tia1 Cytotoxic Granule-Associated Rna Binding Protein-Like 1    | 8.11  | 43.39    |
| IP100229604 | Q8CGZ0  | Cherp    | Calcium Homeostasis Endoplasmic Reticulum Protein               | 9.21  | 106.17   |
| IP100329839 | Q810A7  | Ddx42    | Dead (Asp-Glu-Ala-Asp) Box Polypeptide 42                       | 6.50  | 101.96   |
| IP100379480 | Q8BZX4  | Sfrs12   | Splicing Factor, Arginine/Serine-Rich 12                        | 10.48 | 56.76    |
| IP100622716 | Q9CWL8  | Ctnnb1   | Catenin, Beta Like 1                                            | 4.98  | 64.98    |
| IP100320208 | O70251  | Eef1B2   | Eukaryotic Translation Elongation Factor 1 Beta 2               | 4.53  | 24.56    |
| IP100121159 | Q9JJ80  | Rpf2     | Brix Domain Containing 1                                        | 10.05 | 35.36    |
| IP100380738 | Q6PFF0  | Sfrs15   | Splicing Factor, Arginine/Serine-Rich 15                        | 9.62  | 131.68   |
| IP100830853 | Q6NV83  | Sr140    | U2 Snmp-Associated Surp Motif-Containing Protein                | 8.60  | 118.26   |
| IP100135655 | Q9QY76  | Vapb     | Vesicle-Associated Membrane Protein, Associated Protein B And C | 7.84  | 26.82    |
| IP100113576 | Q3U7R4  | Ddx24    | Dead (Asp-Glu-Ala-Asp) Box Polypeptide 24                       | 9.40  | 96.33    |
| IP100340815 | Q0VBL3  | Rbm15    | Rna Binding Motif Protein 15                                    | 10.09 | 105.72   |
| IP100875068 | Q52L67  | Tecr     | Trans-2,3-Enoyl-Coa Reductase                                   | 9.48  | 41.90    |
| IP100132456 | Q9CQE8  | Cn166    | Upf0568 Protein C14Orf166 Homolog                               | 6.40  | 28.15    |
| IP100122227 | Q62150  | Rnps1    | Hypothetical Protein Loc100044797                               | 10.82 | 40.89    |
| IP100230133 | P43276  | Hist1H1B | Histone Cluster 1, H1B                                          | 10.91 | 22.44    |
| IP100131224 | P62869  | Tceb2    | Transcription Elongation Factor B (Siii), Polypeptide 2         | 4.87  | 13.17    |
| IP100468896 | O569Z5  | Ddx46    | Dead (Asp-Glu-Ala-Asp) Box Polypeptide 46                       | 9.30  | 117.45   |
| IP100380737 | Q8K3Z9  | Pom121   | Nuclear Pore Membrane Protein 121                               | 10.21 | 121.02   |
| IP100403509 | Q9CX58  | Psmc8    | Proteasome 26S Subunit, Non-Atpase, 8                           | 9.61  | 39.93    |
| IP100468437 | Q9CR47  | Nsa2     | Ribosome Biogenesis Protein Nsa2 Homolog                        | 10.25 | 30.04    |
| IP100109813 | Q9CX86  | Hnmpa0   | Heterogeneous Nuclear Ribonucleoprotein A0                      | 9.35  | 30.53    |
| IP100133163 | Q9CR51  | Atp6V1G1 | Atpase, H+ Transporting, Lysosomal V1 Subunit G1                | 7.99  | 13.59    |
| IP100112414 | Q9ERK4  | Cse1L    | Chromosome Segregation 1-Like                                   | 5.52  | 110.45   |
| IP100116283 | P80318  | Cct3     | Chaperonin Containing Tcp1, Subunit 3 (Gamma)                   | 6.28  | 60.63    |
| IP100654283 | Q3U3M5  | Ccnk     | Cyclin K                                                        | 8.60  | 64.35    |
| IP100116277 | P80315  | Cct4     | Chaperonin Containing Tcp1, Subunit 4 (Delta)                   | 8.33  | 57.94    |
| IP100122698 | Q60973  | Rbbp7    | Retinoblastoma Binding Protein 7                                | 4.89  | 47.79    |
| IP100406492 | Q9JII5  | Dazap1   | Daz Associated Protein 1                                        | 8.73  | 43.21    |
| IP100408215 | Q7TQD7  | Myo1B    | Myosin Ib                                                       | 9.39  | 132.05   |
| IP100623284 | Q99NB9  | Sf3B1    | Splicing Factor 3B, Subunit 1                                   | 6.65  | 145.82   |
| IP100224729 | Q8C2Q7  | Hnmp1    | Heterogeneous Nuclear Ribonucleoprotein H1                      | 6.33  | 51.22    |
| IP100127315 | Q91W53  | Golga7   | Golgi Autoantigen, Golgin Subfamily A, 7                        | 6.60  | 15.79    |
| IP100453707 | Q8BYB9  | Ktcl1    | Ktcl (Lys-Tyr-Glu-Leu) Containing 1                             | 8.83  | 43.73    |
| IP100330406 | D3Z0M9  | Ddx23    | Mcg18410, Isoform Cra_A                                         | 9.60  | 95.49    |
| IP100138790 | Q3USK2  | Csnk1D   | Casein Kinase 1, Delta                                          | 9.95  | 49.12    |
| IP100354819 | Q60605  | Myf6     | Myosin, Light Polypeptide 6                                     | 4.56  | 16.80    |
| IP100309195 | Q8C7Q4  | Rbm4     | Rna Binding Motif Protein 4                                     | 6.61  | 40.05    |
| IP100556768 | Q569Z6  | Thrap3   | Thyroid Hormone Receptor Associated Protein 3                   | 10.17 | 108.18   |
| IP100113262 | Q35593  | Psmc14   | Proteasome 26S Subunit, Non-Atpase, 14                          | 6.06  | 34.58    |
| IP100117247 | Q99LW6  | Yaf2     | Yy1 Associated Factor 2                                         | 9.65  | 19.65    |
| IP100123292 | Q0P6B2  | Fubp1    | Far Upstream Element Binding Protein 1                          | 7.18  | 67.20    |
| IP100469268 | P42932  | Cct8     | Chaperonin Containing Tcp1, Subunit 8                           | 5.43  | 59.42    |
| IP100845638 | Q4VA53  | Pds5B    | Pds5, Regulator Of Cohesion Maintenance, Homolog B              | 8.71  | 164.42   |
| IP100876109 | Q80WV6  | Prmt1    | Protein Arginine N-Methyltransferase 1                          | 5.45  | 40.76    |
| IP100108335 | P70388  | Rad50    | Rad50 Homolog                                                   | 6.53  | 153.49   |
| IP100116279 | P80316  | Cct5     | Chaperonin Containing Tcp1, Subunit 5 (Epsilon)                 | 5.72  | 59.49    |
| IP100474430 | Q8C671  | Sfrs2    | Splicing Factor, Arginine/Serine-Rich 2                         | 11.23 | 29.00    |
| IP100606586 | Q3ULS2  | Smc2     | Structural Maintenance Of Chromosomes 2                         | 8.55  | 139.29   |
| IP100123624 | Q8VDP4  | K1967    | Dbird Complex Subunit Kiaa1967 Homolog                          | 5.15  | 103.00   |
| IP100415385 | Q8K019  | Bclaf1   | Bcl2-Associated Transcription Factor 1                          | 10.00 | 106.00   |
| IP100653841 | Q3UJV2  | Capza1   | Capping Protein Muscle Z-Line, Alpha 1                          | 6.26  | 33.29    |
| IP100120046 | Q9DBR1  | Xrn2     | 5'-3' Exoribonuclease 2                                         | 7.52  | 108.69   |
| IP100108895 | P54775  | Psmc4    | Proteasome 26S Subunit, Atpase, 4                               | 5.09  | 47.41    |
| IP100169797 | Q8K205  | Pop1     | Processing Of Precursor 1, Ribonuclease P/Mrp Family            | 9.30  | 117.37   |
| IP100828225 | Q3U9U5  | Bcap31   | B-Cell Receptor-Associated Protein 31                           | 8.42  | 27.99    |
| IP100458583 | Q8VEK3  | Hnmpu    | Heterogeneous Nuclear Ribonucleoprotein U                       | 5.92  | 87.79    |
| IP100311453 | Q922K7  | Nop2     | Nop2 Nucleolar Protein Homolog                                  | 9.27  | 86.75    |
| IP100877221 | Q6P4S8  | Ints1    | Integrator Complex Subunit 1                                    | 5.87  | 245.17   |
| IP100225254 | O88441  | Mtx2     | Metaxin 2                                                       | 5.44  | 29.76    |
| IP100318841 | Q9D8N0  | Eef1G    | Eukaryotic Translation Elongation Factor 1 Gamma                | 6.33  | 49.93    |
| IP100320217 | P80314  | Cct2     | Chaperonin Containing Tcp1, Subunit 2 (Beta)                    | 5.98  | 57.35    |
| IP100944159 | D3YXK2  | Safb1    | Scaffold Attachment Factor B1                                   | 5.25  | 104.97   |
| IP100130115 | O88384  | Vti1B    | Vesicle Transport Through Interaction With T-Snares 1B Homolog  | 8.75  | 26.58    |
| IP100109672 | Q04736  | Yes1     | Yamaguchi Sarcoma Viral (V-Yes) Oncogene Homolog 1              | 6.23  | 60.50    |
| IP100387354 | P97452  | Bop1     | Block Of Proliferation 1                                        | 5.86  | 82.41    |
| IP100187270 | Q9CYA6  | Zcchc8   | Zinc Finger, Cchc Domain Containing 8                           | 4.65  | 77.89    |
| IP100283862 | Q9R1P4  | Psma1    | Proteasome Subunit, Alpha Type 1                                | 6.00  | 29.65    |
| IP100675850 | Q91VJ5  | Pqbp1    | Polyglutamine Binding Protein 1                                 | 5.88  | 30.47    |
| IP100118853 | Q61216  | Mre11A   | Melotic Recombination 11 Homolog A                              | 5.70  | 80.22    |
| IP100380394 | Q7TPD0  | Ints3    | Integrator Complex Subunit 3                                    | 5.53  | 117.94   |
| IP100330483 | Q80W00  | Ppp1R10  | Protein Phosphatase 1, Regulatory Subunit 10                    | 9.21  | 94.37    |
| IP100112320 | Q9ERF3  | Wdr61    | Wd Repeat Domain 61                                             | 5.10  | 33.64    |
| IP100122038 | Q921N6  | Ddx27    | Dead (Asp-Glu-Ala-Asp) Box Polypeptide 27                       | 9.29  | 85.94    |
| IP100132443 | Q9D0E1  | Hnmpm    | Heterogeneous Nuclear Ribonucleoprotein M                       | 8.81  | 77.52    |
| IP100229728 | Q8CHT3  | Ints5    | Integrator Complex Subunit 5                                    | 6.60  | 108.35   |
| IP100114667 | P26516  | Psmc7    | Proteasome 26S Subunit, Non-Atpase, 7                           | 6.31  | 36.41    |
| IP100331644 | O70435  | Psma3    | Proteasome Subunit, Alpha Type 3                                | 5.29  | 28.27    |
| IP100400163 | Q6PGB6  | Naa50    | N-Acetyltransferase 13                                          | 8.96  | 19.41    |
| IP100340860 | Q05CL8  | Larp7    | La Ribonucleoprotein Domain Family, Member 7                    | 9.56  | 64.80    |
| IP100319509 | P97449  | Anpep    | Alanyl (Membrane) Aminopeptidase                                | 5.62  | 109.52   |
| IP100750595 | Q9CQ19  | Myf9     | Myosin, Light Polypeptide 9                                     | 4.78  | 19.72    |
| IP100119166 | Q9DB85  | Rrp8     | Ribosomal Rna Processing 8                                      | 9.79  | 51.07    |
| IP100117771 | Q99M99  | Ddx50    | Dead (Asp-Glu-Ala-Asp) Box Polypeptide 50                       | 9.33  | 82.18    |
| IP100407764 | Q9CSH3  | Dis3     | Dis3 Mitotic Control Homolog                                    | 7.23  | 108.84   |
| IP100153421 | Q8R1Q8  | Dync1L1  | Dynein Cytoplasmic 1 Light Intermediate Chain 1                 | 6.01  | 56.61    |
| IP100330057 | Q9CQJ6  | Denr     | Density-Regulated Protein                                       | 5.21  | 22.03    |
| IP100137400 | P70227  | Itrp3    | Inositol 1,4,5-Triphosphate Receptor 3                          | 6.11  | 304.27   |
| IP100314709 | O35326  | Sfrs5    | Splicing Factor, Arginine/Serine-Rich 5                         | 11.38 | 30.94    |
| IP100115833 | Q7TSJ2  | Mtap6    | Microtubule-Associated Protein 6                                | 9.51  | 96.45    |
| IP100626860 | Q9DB27  | Mcts1    | Malignant T Cell Amplified Sequence 1                           | 8.98  | 20.56    |
| IP100119224 | P62320  | Snrpd3   | Small Nuclear Ribonucleoprotein D3                              | 10.33 | 13.92    |
| IP101027807 | Q00PI9  | Hnmpul2  | Heterogeneous Nuclear Ribonucleoprotein U-Like 2                | 4.83  | 85.00    |
| IP100113798 | Q9D3L3  | Snap23   | Synaptosomal-Associated Protein 23                              | 4.84  | 24.55    |

| Protein ID  | Uniprot | Symbol   | Protein name                                                         | pI    | Mw (kDa) |
|-------------|---------|----------|----------------------------------------------------------------------|-------|----------|
| IP100118447 | P42669  | Pura     | Similar To Hcg45299                                                  | 6.06  | 34.88    |
| IP100753815 | P16546  | Spna2    | Spectrin Alpha 2                                                     | 5.20  | 284.60   |
| IP100620222 | Q9W7I7  | Myo1C    | Myosin Ic                                                            | 9.41  | 121.94   |
| IP100858139 | E9Q360  | Ints10   | Integrator Complex Subunit 10                                        | 7.03  | 84.83    |
| IP100119036 | Q9DB40  | Med27    | Mediator Complex Subunit 27                                          | 9.37  | 35.30    |
| IP100223714 | P43274  | Hist1H1E | Histone Cluster 1, H1E                                               | 11.10 | 21.85    |
| IP100458765 | Q60749  | Khdrbs1  | Kh Domain Containing, Rna Binding, Signal Transduction Associated 1  | 8.81  | 48.37    |
| IP100111265 | P47754  | Capza2   | Capping Protein Muscle Z-Line, Alpha 2                               | 5.58  | 32.84    |
| IP100319830 | Q62261  | Spnb2    | Spectrin Beta 2                                                      | 5.40  | 274.22   |
| IP100648927 | Q3THU7  | Cita     | Clathrin, Light Polypeptide                                          | 4.39  | 23.56    |
| IP100322922 | Q9WV03  | Fam50A   | Family With Sequence Similarity 50, Member A                         | 6.39  | 40.25    |
| IP100169463 | P68372  | Tubb2C   | Tubulin, Beta 2C                                                     | 4.79  | 49.83    |
| IP100113660 | P61290  | Psme3    | Proteasome 28 Subunit, 3                                             | 5.69  | 29.37    |
| IP100470178 | P97314  | Csrp2    | Cysteine And Glycine-Rich Protein 2                                  | 8.96  | 20.79    |
| IP100339468 | O70133  | Dhx9     | Deah (Asp-Glu-Ala-His) Box Polypeptide 9                             | 6.39  | 149.47   |
| IP100116281 | P80317  | Cct6A    | Chaperonin Containing Tcp1, Subunit 6A (Zeta)                        | 6.67  | 57.87    |
| IP100129299 | Q920P5  | Twf2     | Twinfilin, Actin-Binding Protein, Homolog 2                          | 6.35  | 39.34    |
| IP100130489 | Q6PHN9  | Rab35    | Rab35, Member Ras Oncogene Family                                    | 8.54  | 22.89    |
| IP100111556 | P62715  | Ppp2Cb   | Protein Phosphatase 2 (Formerly 2A), Catalytic Subunit, Beta Isoform | 5.21  | 35.58    |
| IP100471361 | Q9WUD1  | Stub1    | Stp1 Homology And U-Box Containing Protein 1                         | 5.71  | 34.91    |
| IP100127707 | Q61990  | Pcbp2    | Poly(Rc) Binding Protein 2                                           | 6.33  | 38.22    |
| IP100459493 | P11983  | Tcp1     | T-Complex Protein 1                                                  | 5.82  | 60.45    |
| IP100119806 | Q8BJW6  | Eif2A    | Eukaryotic Translation Initiation Factor 2A                          | 9.04  | 64.27    |
| IP100471277 | Q8CGF7  | Tceog1   | Transcription Elongation Regulator 1                                 | 8.71  | 123.79   |
| IP100115607 | Q99JY0  | Hadhb    | Trifunctional Enzyme Subunit Beta, Mitochondrial                     | 9.24  | 47.58    |
| IP100225912 | Q91VE6  | Mki67lp  | Mki67 (Fha Domain) Interacting Nucleolar Phosphoprotein              | 10.24 | 36.13    |
| IP100221608 | Q8BGH2  | Samm50   | Sorting And Assembly Machinery Component 50 Homolog                  | 6.34  | 51.86    |
| IP100395100 | Q7M754  | Try10L   | Try10-Like Trypsinogen                                               | 4.83  | 24.78    |
| IP100131873 | O88545  | Cops6    | Cop9 Homolog, Subunit 6                                              | 5.47  | 35.88    |
| IP100130510 | Q91YU8  | Ppan     | Peter Pan Homolog                                                    | 10.33 | 52.76    |
| IP101026971 | P35601  | Rfc1     | Replication Factor C 1                                               | 9.38  | 125.99   |
| IP100123181 | Q8VDD5  | Myh9     | Myosin, Heavy Polypeptide 9, Non-Muscle                              | 5.54  | 226.24   |
| IP100331091 | Q77QK1  | Ints7    | Integrator Complex Subunit 7                                         | 8.54  | 106.86   |
| IP100468924 | Q8BMD3  | Sic25A24 | Solute Carrier Family 25, Member 24                                  | 7.02  | 52.90    |
| IP100130304 | Q91YN9  | Bag2     | Bcl2-Associated Athanogene 2                                         | 6.01  | 23.47    |
| IP100129685 | P63028  | Tpt1     | Tumor Protein, Translationally-Controlled 1                          | 4.76  | 19.46    |
| IP100125267 | Q9WV55  | Vapa     | Vesicle-Associated Membrane Protein, Associated Protein A            | 8.60  | 27.72    |
| IP100133428 | P62192  | Psmc1    | Protease 26S Subunit, Atpase 1                                       | 5.87  | 49.05    |
| IP100314507 | O88291  | Zfp326   | Zinc Finger Protein 326                                              | 5.09  | 65.23    |
| IP100229883 | Q8CIM8  | Ints4    | Integrator Complex Subunit 4                                         | 5.98  | 108.19   |
| IP100136483 | P70195  | Psmb7    | Proteasome Subunit, Beta Type 7                                      | 5.84  | 25.25    |
| IP100120919 | Q62018  | Ctr9     | Ctr9, Paf1/Rna Polymerase Ii Complex Component, Homolog              | 6.08  | 133.41   |
| IP100129430 | Q8VJ6   | Sfpq     | Splicing Factor Proline/Glutamine Rich                               | 9.45  | 75.44    |
| IP100229571 | Q8CH25  | Sitm     | Safb-Like, Transcription Modulator                                   | 7.49  | 116.79   |
| IP100944009 | P57776  | Eef1D    | Elongation factor 1-delta                                            | 4.91  | 31.16    |
| IP100890038 | Q6ZWR6  | Syne1    | Synaptic Nuclear Envelope 1                                          | 5.43  | 1009.93  |
| IP100671847 | Q9DBR7  | Ppp1R12A | Protein Phosphatase 1, Regulatory Subunit 12A                        | 5.38  | 115.00   |
| IP100352475 | Q3UHX2  | Pdap1    | Pdgfra Associated Protein 1                                          | 6.80  | 20.60    |
| IP100131870 | O88543  | Cops3    | Cop9 Homolog, Subunit 3                                              | 6.20  | 47.70    |
| IP100128918 | Q8V184  | Noc3L    | Nucleolar Complex Associated 3 Homolog                               | 9.16  | 93.21    |
| IP100318750 | Q99LB2  | Dhrs4    | Dehydrogenase/Reductase Member 4                                     | 9.56  | 29.91    |
| IP100132462 | P52912  | Tia1     | Cytotoxic Granule-Associated Rna Binding Protein 1                   | 7.62  | 42.80    |
| IP100124819 | Q9WUM3  | Coro1B   | Coronin, Actin Binding Protein 1B                                    | 5.54  | 53.91    |
| IP100467104 | Q9JU28  | Fili     | Flightless I Homolog                                                 | 5.75  | 144.80   |
| IP100119239 | Q60692  | Psmb6    | Proteasome Subunit, Beta Type 6                                      | 4.99  | 22.00    |
| IP100307837 | P10126  | Eef1A1   | Eukaryotic Translation Elongation Factor 1 Alpha 1                   | 9.10  | 50.11    |
| IP100120264 | Q60766  | Irgm1    | Immunity-Related Gtpase Family M Member 1                            | 8.56  | 46.55    |
| IP100137212 | Q9QZB9  | Dctn5    | Dynactin 5                                                           | 8.32  | 20.14    |
| IP100120083 | Q9DBS1  | Tmem43   | Transmembrane Protein 43                                             | 6.93  | 44.65    |
| IP100114878 | Q99J47  | Dhrs7B   | Dehydrogenase/Reductase Member 7B                                    | 9.66  | 34.99    |
| IP100117569 | Q9DB79  | Rps11    | Ribosomal Protein S11                                                | 10.15 | 19.41    |
| IP100136002 | Q91Z31  | Ptbp2    | Poly(pyrimidine Tract Binding Protein 2                              | 8.72  | 57.49    |
| IP100222515 | Q8BG32  | Psmc11   | Proteasome 26S Subunit, Non-Atpase, 11                               | 6.09  | 47.31    |
| IP100319965 | Q99J44  | Psmc6    | Proteasome 26S Subunit, Non-Atpase, 6                                | 5.38  | 45.41    |
| IP100131407 | Q9Z2U1  | Psmc5    | Proteasome Subunit, Alpha Type 5                                     | 4.74  | 26.41    |
| IP100454049 | Q8BH95  | Echs1    | Enoyl Coenzyme A Hydratase, Short Chain, 1, Mitochondrial            | 7.78  | 28.47    |
| IP100322562 | P62264  | Rps14    | Predicted Gene 6204                                                  | 10.08 | 16.14    |
| IP100129792 | O35343  | Kpna4    | Karyopherin Alpha 4                                                  | 4.79  | 57.79    |
| IP100129178 | P29758  | Oat      | Ornithine Aminotransferase                                           | 5.73  | 45.79    |
| IP100138089 | Q505F5  | Lrrc47   | Leucine Rich Repeat Containing 47                                    | 8.39  | 63.46    |
| IP100755200 | A2AQPO  | Myh7B    | Myosin, Heavy Chain 7B, Cardiac Muscle, Beta                         | 5.69  | 221.50   |
| IP100420344 | Q6P5B0  | Rrp12    | Ribosomal Rna Processing 12 Homolog                                  | 9.07  | 143.13   |
| IP100124820 | Q9WUM4  | Coro1C   | Coronin, Actin Binding Protein 1C                                    | 6.65  | 53.12    |
| IP100117910 | Q61171  | Prdx2    | Peroxiredoxin 2                                                      | 5.20  | 21.65    |
| IP100625263 | Q3UGL7  | Parp3    | Poly (Adp-Ribose) Polymerase Family, Member 3                        | 6.69  | 59.45    |
| IP100137612 | P70279  | Surf6    | Surfeit Gene 6                                                       | 10.52 | 41.23    |
| IP100310091 | Q76MZ3  | Ppp2R1A  | Protein Phosphatase 2, Regulatory Subunit A                          | 5.00  | 65.19    |
| IP100322492 | Q5SU59  | Ewsr1    | Ewing sarcoma breakpoint region 1                                    | 9.33  | 69.04    |
| IP100621842 | Q03173  | Enah     | Enabled Homolog                                                      | 7.62  | 85.84    |
| IP100227299 | P20152  | Vim      | Vimentin                                                             | 5.05  | 53.56    |
| IP100465876 | Q6DVA0  | Lemd2    | Lem Domain Containing 2                                              | 9.18  | 57.51    |
| IP101027353 | Q8BHD7  | Rod1     | Rod1 Regulator Of Differentiation 1                                  | 9.20  | 56.70    |
| IP100118022 | P62743  | Ap2S1    | Adaptor-Related Protein Complex 2, Sigma 1 Subunit                   | 5.80  | 17.02    |
| IP100114368 | O08547  | Sec22B   | Sec22 Vesicle Trafficking Protein Homolog B                          | 8.58  | 24.61    |
| IP100387439 | Q80UZZ  | Sdad1    | Sda1 Domain Containing 1                                             | 9.25  | 79.56    |
| IP100121319 | Q9DCT8  | Crip2    | Cysteine Rich Protein 2                                              | 8.94  | 22.73    |
| IP100652660 | Q3UFM5  | Nom1     | Nucleolar Protein With Mif4G Domain 1                                | 9.01  | 95.96    |
| IP100314439 | P14685  | Psmc3    | Proteasome 26S Subunit, Non-Atpase, 3                                | 8.48  | 60.72    |
| IP100153212 | Q8ROK4  | Ccdc137  | Coiled-Coil Domain Containing 137                                    | 10.69 | 32.92    |
| IP100406117 | Q77MK9  | Syncrip  | Synaptotagmin Binding, Cytoplasmic Rna Interacting Protein           | 8.68  | 69.50    |
| IP100664886 | Q3UUT9  | Thoc2    | Tho Complex 2                                                        | 5.18  | 46.46    |
| IP100270326 | P46471  | Psmc2    | Proteasome 26S Subunit, Atpase 2                                     | 5.72  | 48.52    |
| IP100318561 | Q9D7Z3  | Noi7     | Nucleolar Protein 7                                                  | 9.62  | 28.97    |
| IP100465946 | Q80VD1  | Fam98B   | Family With Sequence Similarity 98, Member B                         | 8.77  | 45.35    |
| IP100124291 | P97390  | Vps45    | Vacuolar Protein Sorting 45                                          | 8.42  | 65.05    |
| IP100458958 | Q9CYX7  | Rrp15    | Ribosomal Rna Processing 15 Homolog                                  | 8.86  | 31.06    |
| IP100620256 | P48678  | Lmina    | Lamin A                                                              | 6.54  | 73.91    |

**pI:** isoelectric point      **Mw:** molecular weight (kDa)

**Table S2.** The sequences of the primers for quantitative RT-PCR and RT-PCR

| Gene, accession no.          | Primer sequence (5' to 3')                                             | Product size |
|------------------------------|------------------------------------------------------------------------|--------------|
|                              |                                                                        | <i>bp</i>    |
| <b>Quantitative RT-PCR</b>   |                                                                        |              |
| Parp1, NM_007415.2           | F: CGGAGAGGCTTTATCGAGTGGAGTA; R: AAGCAGGAGAAGTGGTACCAGTGTG             | 157          |
| Nanog, NM_028016.2           | F: TGGTCCCCACAGTTTGCCTAGTTCT; R: GGTAGAAGAATCAGGGCTGCCTGA              | 192          |
| Gapdh, NM_008084.2           | F: CTCATGACCACAGTCCATGC; R: TTCAGCTCTGGGATGACCTT                       | 155          |
| <b>RT-PCR</b>                |                                                                        |              |
| Nanog, NM_028016.2           | F: CCTTGAGCCGTTGGCCTTCAGAT; R: GCTGCCCCACATGGAAAGGCT                   | 808          |
| Dppa5aL (Esg1), NM_025274.3  | F: CGCCACACAGGTAATAAACTTCCTG; R: AACTGGCCACAGCTTAACCTGC                | 515          |
| ErasL, NM_181548.2           | F: CCAACTGTCCGGTCAGATCCGC; R: GCCTCTGGGCCCTCTGAATCT                    | 713          |
| mRex1 (Zfp42), NM_009556.3   | F: GCCAGCAGCTCCTGCACACA; R: TGAGCTGCCCCAACCTCA                         | 631          |
| Nat (Eif4g2), NM_001040131.2 | F: ATTCTTCGTTGTCAAGCCGCCAAAGTGGAG; R:<br>AGTTGTTTGTGCGGAGTTGTCATCTCGTC | 223          |

F, forward; R, reverse.

**Table S3.** The sequences of shRNA and the primers for Parp1 promoter constructs

| shRNA/construct                  | Sequence/primer (5' to 3')                                    |
|----------------------------------|---------------------------------------------------------------|
| <b>shParp1</b>                   |                                                               |
| TRCN0000071209                   | GCCCTTGAAACATGTATGAA                                          |
| <b>shParp2</b>                   |                                                               |
| Oligo Sequence                   | CCGGCGTTACCAGTCTCTCAAGAACTCGAGTCTTGAGAGACTGGTAACCGTTTTT       |
| <b>Parp1 promoter constructs</b> |                                                               |
| –2,000 fragment                  | F: CCATGATACAATGACATGGCGAAAG; R: CTCTTCGCGTACTCCACTCGATAAA    |
| –1,650 fragment                  | F: AGACAGGGTTTCTCTGTGTAGCCCT; R: CTCTTCGCGTACTCCACTCGATAAA    |
| –1,100 fragments                 | F: GAAAAAGAGCAGCAACAGAGGAAGC; R: CTCTTCGCGTACTCCACTCGATAAA    |
| –600 fragments                   | F: GATGAGAACACACGACATCTGTTGT; R: CTCTTCGCGTACTCCACTCGATAAA    |
| –125 fragments                   | F: CTAGGCATCAGTAATCTATCCTGAG; R: CTCTTCGCGTACTCCACTCGATAAA    |
| C1 c-Myc site                    | F: TTCCAGACAGGGTTTCTCTGTGTAG; R: CAAGTCCTCTGAAAGAGTAACCACT    |
| C2 c-Myc site                    | F: CTTTATAGTGAGACCCTGCATCACG; R: TAGATCA G GCTGGCCAAGAAGTACAC |
| C3 c-Myc site                    | F: AAGCCTTTCTGGGACAAACCGACAA; R: TCAGGATAGATTACTGATGCCTAGC    |

F, forward; R, reverse.

**Table S4.** List of proteins tested by antibodies

| Protein                   | Assay      | Antibody | Origin                         | Dilution              | Incubation period |
|---------------------------|------------|----------|--------------------------------|-----------------------|-------------------|
| Oct4                      | WB         | mmAb     | Cell Signaling Technology      | 1:1,000               | Overnight         |
| Oct4                      | IF         | rmAb     | Cell Signaling Technology      | 1:200                 | Overnight         |
| Sox2                      | WB         | rmAb     | Cell Signaling Technology      | 1:1,000               | Overnight         |
| Klf4                      | WB         | rpAb     | Cell Signaling Technology      | 1:1,000               | Overnight         |
| c-Myc                     | WB         | rmAb     | Cell Signaling Technology      | 1:1,000               | Overnight         |
| Parp1                     | WB, IF, IP | rmAb     | Cell Signaling Technology      | 1:1,000, 1:200, 1:100 | Overnight         |
| Nanog                     | WB         | rpAb     | Millipore                      | 1:1,000               | Overnight         |
| lamin A/C                 | WB         | rmAb     | Cell Signaling Technology      | 1:1,000               | Overnight         |
| Pcna                      | WB         | mpAb     | Cell Signaling Technology      | 1:2,000               | Overnight         |
| Topoisomerase II $\alpha$ | WB         | rpAb     | Cell Signaling Technology      | 1:500                 | Overnight         |
| Parp2                     | WB         | mmAb     | Millipore                      | 1:500                 | Overnight         |
| Chd1L                     | WB         | mmAb     | Abcam                          | 1:50                  | Overnight         |
| Ssrp1                     | WB         | mmAb     | Santa Cruz Biotechnology, Inc. | 1:300                 | Overnight         |
| DNA ligase III            | WB         | rpAb     | GeneTex                        | 1:500                 | Overnight         |
| Ku-70(Xrcc-6)             | WB         | gpAb     | Santa Cruz Biotechnology, Inc. | 1:500                 | Overnight         |
| Poly(ADP-ribose)          | WB, IF     | mmAb     | Enzo Life Sciences             | 1:1,000, 1:100        | Overnight         |
| $\beta$ -Actin            | WB         | mmAb     | Millipore                      | 1:10,000              | Overnight         |
| $\alpha$ -Tubulin         | WB         | mmAb     | Sigma-Aldrich                  | 1:10,000              | Overnight         |

Abbreviations: WB, Western blot; mmAb, mouse mAb; rmAb, rabbit mAb; rpAb, rabbit polyclonal Ab; gpAb, goat pAb; FC, flow cytometry; IF, immunofluorescence; IP, immunoprecipitation.
